# Supplementary material for: Going beyond the routine consideration of solvent effects on 31P NMR shielding constants: a meticulous basis set study and new aug-pecS-n (n = 1 and 2) basis sets for phosphorus atoms
Source: Royal Society of Chemistry journal article supplement (doi:10.1039/d5cp00313j), 2025-01-01
Supplement: d5cp00313j1.pdf [file d5cp00313j1.pdf]

**Supplementary Material** for article

**Going beyond the routine consideration of solvent effects on  $^{31}\text{P}$  NMR shielding constants: a meticulous basis set study and new aug-pecS- $n$  ( $n = 1, 2$ ) basis sets for phosphorus atom**

by *Yuriy Yu. Rusakov, Yuliya A. Nikurashina and Irina L. Rusakova*

**Contents**

|                                                                                                                                                                                                                        |     |
|------------------------------------------------------------------------------------------------------------------------------------------------------------------------------------------------------------------------|-----|
| The <b>aug-pecS-1</b> basis sets for <b>phosphorus</b> atom in Gaussian format .....                                                                                                                                   | S4  |
| The <b>aug-pecS-2</b> basis sets for <b>phosphorus</b> atom in Gaussian format .....                                                                                                                                   | S6  |
| <b>Table S1.</b> Equilibrium geometries for neutral molecules <b>1-12</b> and anions <b>13-17</b> calculated at the DFT(M06-2X)/cc-pVQZ level of theory .....                                                          | S10 |
| <b>Table S2.</b> Equilibrium geometries for molecules <b>3, 6, 7, 18-23</b> calculated at the DFT(M06-2X)/cc-pV5Z level of theory.....                                                                                 | S12 |
| <b>Table S3.</b> $^{31}\text{P}$ NMR shielding constants (in ppm) and solvent corrections ( $\Delta\text{sol}$ ) of molecules <b>1-12</b> calculated at the GIAO-DFT(B97-2)/ <b>aug-pecS-4</b> level of theory .....   | S14 |
| <b>Table S4.</b> $^{31}\text{P}$ NMR shielding constants (in ppm) and solvent corrections ( $\Delta\text{sol}$ ) of molecules <b>1-12</b> calculated at the GIAO-DFT(B97-2)/ <b>cc-pVDZ</b> level of theory.....       | S14 |
| <b>Table S5.</b> $^{31}\text{P}$ NMR shielding constants (in ppm) and solvent corrections ( $\Delta\text{sol}$ ) of molecules <b>1-12</b> calculated at the GIAO-DFT(B97-2)/ <b>cc-pVTZ</b> level of theory.....       | S15 |
| <b>Table S6.</b> $^{31}\text{P}$ NMR shielding constants (in ppm) and solvent corrections ( $\Delta\text{sol}$ ) of molecules <b>1-12</b> calculated at the GIAO-DFT(B97-2)/ <b>cc-pVQZ</b> level of theory .....      | S15 |
| <b>Table S7.</b> $^{31}\text{P}$ NMR shielding constants (in ppm) and solvent corrections ( $\Delta\text{sol}$ ) of molecules <b>1-12</b> calculated at the GIAO-DFT(B97-2)/ <b>cc-pV5Z</b> level of theory.....       | S15 |
| <b>Table S8.</b> $^{31}\text{P}$ NMR shielding constants (in ppm) and solvent corrections ( $\Delta\text{sol}$ ) of molecules <b>1-12</b> calculated at the GIAO-DFT(B97-2)/ <b>aug-cc-pVDZ</b> level of theory .....  | S16 |
| <b>Table S9.</b> $^{31}\text{P}$ NMR shielding constants (in ppm) and solvent corrections ( $\Delta\text{sol}$ ) of molecules <b>1-12</b> calculated at the GIAO-DFT(B97-2)/ <b>aug-cc-pVTZ</b> level of theory .....  | S16 |
| <b>Table S10.</b> $^{31}\text{P}$ NMR shielding constants (in ppm) and solvent corrections ( $\Delta\text{sol}$ ) of molecules <b>1-12</b> calculated at the GIAO-DFT(B97-2)/ <b>aug-cc-pVQZ</b> level of theory ..... | S17 |
| <b>Table S11.</b> $^{31}\text{P}$ NMR shielding constants (in ppm) and solvent corrections ( $\Delta\text{sol}$ ) of molecules <b>1-12</b> calculated at the GIAO-DFT(B97-2)/ <b>aug-cc-pV5Z</b> level of theory.....  | S17 |
| <b>Table S12.</b> $^{31}\text{P}$ NMR shielding constants (in ppm) and solvent corrections ( $\Delta\text{sol}$ ) of molecules <b>1-12</b> calculated at the GIAO-DFT(B97-2)/ <b>pecS-1</b> level of theory.....       | S17 |
| <b>Table S13.</b> $^{31}\text{P}$ NMR shielding constants (in ppm) and solvent corrections ( $\Delta\text{sol}$ ) of molecules <b>1-12</b> calculated at the GIAO-DFT(B97-2)/ <b>pecS-2</b> level of theory.....       | S18 |

|                                                                                                                                                                                                                                                       |     |
|-------------------------------------------------------------------------------------------------------------------------------------------------------------------------------------------------------------------------------------------------------|-----|
| <b>Table S14.</b> <sup>31</sup> P NMR shielding constants (in ppm) and solvent corrections ( $\Delta_{\text{sol}}$ ) of molecules 1-12 calculated at the GIAO-DFT(B97-2)/ <b>aug-pcS-1-mixed</b> level of theory.....                                 | S18 |
| <b>Table S15.</b> <sup>31</sup> P NMR shielding constants (in ppm) and solvent corrections ( $\Delta_{\text{sol}}$ ) of molecules 1-12 calculated at the GIAO-DFT(B97-2)/ <b>aug-pcS-2-mixed</b> level of theory.....                                 | S19 |
| <b>Table S16.</b> <sup>31</sup> P NMR shielding constants (in ppm) and solvent corrections ( $\Delta_{\text{sol}}$ ) of molecules 1-12 calculated at the GIAO-DFT(B97-2)/ <b>6-31G(d,p)</b> level of theory.....                                      | S19 |
| <b>Table S17.</b> <sup>31</sup> P NMR shielding constants (in ppm) and solvent corrections ( $\Delta_{\text{sol}}$ ) of molecules 1-12 calculated at the GIAO-DFT(B97-2)/ <b>6-311G(d,p)</b> level of theory .....                                    | S19 |
| <b>Table S18.</b> <sup>31</sup> P NMR shielding constants (in ppm) and solvent corrections ( $\Delta_{\text{sol}}$ ) of molecules 1-12 calculated at the GIAO-DFT(B97-2)/ <b>6-31++G(d,p)</b> level of theory .....                                   | S20 |
| <b>Table S19.</b> <sup>31</sup> P NMR shielding constants (in ppm) and solvent corrections ( $\Delta_{\text{sol}}$ ) of molecules 1-12 calculated at the GIAO-DFT(B97-2)/ <b>6-311++G(d,p)</b> level of theory .....                                  | S20 |
| <b>Table S20.</b> <sup>31</sup> P NMR shielding constants (in ppm) and solvent corrections ( $\Delta_{\text{sol}}$ ) of molecules 1-12 calculated at the GIAO-DFT(B97-2)/ <b>pcS-1</b> level of theory.....                                           | S21 |
| <b>Table S21.</b> <sup>31</sup> P NMR shielding constants (in ppm) and solvent corrections ( $\Delta_{\text{sol}}$ ) of molecules 1-12 calculated at the GIAO-DFT(B97-2)/ <b>pcS-2</b> level of theory.....                                           | S21 |
| <b>Table S22.</b> <sup>31</sup> P NMR shielding constants (in ppm) and solvent corrections ( $\Delta_{\text{sol}}$ ) of molecules 1-12 calculated at the GIAO-DFT(B97-2)/ <b>pcS-3</b> level of theory.....                                           | S21 |
| <b>Table S23.</b> <sup>31</sup> P NMR shielding constants (in ppm) and solvent corrections ( $\Delta_{\text{sol}}$ ) of molecules 1-12 calculated at the GIAO-DFT(B97-2)/ <b>pcS-4</b> level of theory.....                                           | S22 |
| <b>Table S24.</b> <sup>31</sup> P NMR shielding constants (in ppm) and solvent corrections ( $\Delta_{\text{sol}}$ ) of molecules 1-12 calculated at the GIAO-DFT(B97-2)/ <b>aug-pcS-1</b> level of theory .....                                      | S22 |
| <b>Table S25.</b> <sup>31</sup> P NMR shielding constants (in ppm) and solvent corrections ( $\Delta_{\text{sol}}$ ) of molecules 1-12 calculated at the GIAO-DFT(B97-2)/ <b>aug-pcS-2</b> level of theory .....                                      | S23 |
| <b>Table S26.</b> <sup>31</sup> P NMR shielding constants (in ppm) and solvent corrections ( $\Delta_{\text{sol}}$ ) of molecules 1-12 calculated at the GIAO-DFT(B97-2)/ <b>aug-pcS-3</b> level of theory .....                                      | S23 |
| <b>Table S27.</b> <sup>31</sup> P NMR shielding constants (in ppm) and solvent corrections ( $\Delta_{\text{sol}}$ ) of molecules 1-12 calculated at the GIAO-DFT(B97-2)/ <b>cc-pVDZ-LDBS</b> (P = aug-cc-pVDZ; rest = cc-pVDZ) level of theory.....  | S23 |
| <b>Table S28.</b> <sup>31</sup> P NMR shielding constants (in ppm) and solvent corrections ( $\Delta_{\text{sol}}$ ) of molecules 1-12 calculated at the GIAO-DFT(B97-2)/ <b>cc-pVTZ-LDBS</b> (P = aug-cc-pVTZ; rest = cc-pVTZ) level of theory ..... | S24 |
| <b>Table S29.</b> <sup>31</sup> P NMR shielding constants (in ppm) and solvent corrections ( $\Delta_{\text{sol}}$ ) of molecules 1-12 calculated at the GIAO-DFT(B97-2)/ <b>pcS-1-LDBS</b> (P = aug-pcS-1; rest = pcS-1) level of theory .....       | S24 |
| <b>Table S30.</b> <sup>31</sup> P NMR shielding constants (in ppm) and solvent corrections ( $\Delta_{\text{sol}}$ ) of molecules 1-12 calculated at the GIAO-DFT(B97-2)/ <b>pcS-2-LDBS</b> (P = aug-pcS-2; rest = pcS-2) level of theory .....       | S25 |

|                                                                                                                                                                                                                                                                                                      |     |
|------------------------------------------------------------------------------------------------------------------------------------------------------------------------------------------------------------------------------------------------------------------------------------------------------|-----|
| <b>Table S31.</b> $^{31}\text{P}$ NMR shielding constants (in ppm) and solvent corrections ( $\Delta_{\text{sol}}$ ) of molecules <b>1-12</b> calculated at the GIAO-DFT(B97-2)/ <b>pecS-1-LDBS-mixed</b> (P = aug-pecS-1, rest = pcS-1) level of theory. ....                                       | S25 |
| <b>Table S32.</b> $^{31}\text{P}$ NMR shielding constants (in ppm) and solvent corrections ( $\Delta_{\text{sol}}$ ) of molecules <b>1-12</b> calculated at the GIAO-DFT(B97-2)/ <b>pecS-2-LDBS-mixed</b> (P = aug-pecS-2, rest = pcS-2) level of theory.....                                        | S25 |
| <b>Table S33.</b> $^{31}\text{P}$ NMR shielding constants (in ppm) of molecules <b>13-17</b> calculated at the GIAO-DFT(B97-2)/ <b>pecS-1-mixed</b> (P = pecS-1, rest = pcS-1) level of theory in gas phase.....                                                                                     | S26 |
| <b>Table S34.</b> $^{31}\text{P}$ NMR shielding constants (in ppm) of molecules <b>13-17</b> calculated at the GIAO-DFT(B97-2)/ <b>aug-pecS-1-mixed</b> (P = aug-pecS-1, rest = aug-pcS-1) level of theory in gas phase.....                                                                         | S26 |
| <b>Table S35.</b> $^{31}\text{P}$ NMR shielding constants (in ppm) of molecules <b>13-17</b> calculated at the GIAO-DFT(B97-2)/ <b>pecS-2-mixed</b> (P = pecS-2, rest = pcS-2) level of theory in gas phase.....                                                                                     | S26 |
| <b>Table S36.</b> $^{31}\text{P}$ NMR shielding constants (in ppm) of molecules <b>13-17</b> calculated at the GIAO-DFT(B97-2)/ <b>aug-pecS-2-mixed</b> (P = aug-pecS-2, rest = aug-pcS-2) level of theory in gas phase.....                                                                         | S27 |
| <b>Table S37.</b> $^{31}\text{P}$ NMR shielding constants (in ppm) of molecules <b>13-17</b> calculated at the GIAO-DFT(B97-2)/ <b>pcS-1</b> level of theory in gas phase.....                                                                                                                       | S27 |
| <b>Table S38.</b> $^{31}\text{P}$ NMR shielding constants (in ppm) of molecules <b>13-17</b> calculated at the GIAO-DFT(B97-2)/ <b>aug-pcS-1</b> level of theory in gas phase.....                                                                                                                   | S27 |
| <b>Table S39.</b> $^{31}\text{P}$ NMR shielding constants (in ppm) of molecules <b>13-17</b> calculated at the GIAO-DFT(B97-2)/ <b>pcS-2</b> level of theory in gas phase.....                                                                                                                       | S27 |
| <b>Table S40.</b> $^{31}\text{P}$ NMR shielding constants (in ppm) of molecules <b>13-17</b> calculated at the GIAO-DFT(B97-2)/ <b>aug-pcS-2</b> level of theory in gas phase.....                                                                                                                   | S27 |
| <b>Table S41.</b> $^{31}\text{P}$ NMR shielding constants (in ppm) of molecules <b>13-17</b> calculated at the GIAO-DFT(B97-2)/ <b>aug-pcS-4</b> level of theory in gas phase.....                                                                                                                   | S28 |
| <b>Table S42.</b> Experimental $^{31}\text{P}$ NMR chemical shifts (in ppm) of molecules <b>3, 6, 7, 18-23</b> .....                                                                                                                                                                                 | S28 |
| <b>Table S43.</b> Basic values of $^{31}\text{P}$ NMR shielding constants ( $\sigma_{\text{B}}$ ) of molecules <b>3, 6, 7, 18-23</b> together with relativistic ( $\Delta_{\text{rel}}$ ) and vibrational ( $\Delta_{\text{vib}}$ ) corrections used within the combined computational approach..... | S28 |
| <b>Table S44.</b> Solvent corrections to $^{31}\text{P}$ NMR shielding constants (in ppm) ( $\Delta_{\text{sol}}$ ) of molecules <b>3, 6, 7, 18-23</b> calculated at the GIAO-DFT(B97-2) level of theory with different basis sets.....                                                              | S29 |
| <b>Table S45.</b> Scaled (against experiment) $^{31}\text{P}$ NMR chemical shifts (in ppm) of molecules <b>3, 6, 7, 18-23</b> calculated on the shielding constants obtained within a combined scheme.....                                                                                           | S29 |

The **aug-pecS-1** basis sets for **phosphorus** atom in Gaussian format, [6s5p4d]

P 0

S 10 1.00

9.624103D+04 2.5050D-04

1.433680D+04 1.9880D-03

3.207817D+03 1.0441D-02

9.113076D+02 4.1600D-02

2.994035D+02 1.3162D-01

1.079598D+02 3.1010D-01

4.193807D+01 4.1841D-01

1.715217D+01 2.2512D-01

4.768204D+00 1.5990D-02

1.781925D+00 -2.4702D-03

S 10 1.00

9.624103D+04 6.9844D-05

1.433680D+04 5.3879D-04

3.207817D+03 2.8708D-03

9.113076D+02 1.1393D-02

2.994035D+02 3.9199D-02

1.079598D+02 9.9768D-02

4.193807D+01 1.9688D-01

1.715217D+01 1.1088D-01

4.768204D+00 -5.2681D-01

1.781925D+00 -6.0059D-01

S 10 1.00

9.624103D+04 2.0156D-05

1.433680D+04 1.2087D-04

3.207817D+03 6.6397D-04

9.113076D+02 2.6610D-03

2.994035D+02 9.4376D-03

|   |              |             |
|---|--------------|-------------|
|   | 1.079598D+02 | 2.3077D-02  |
|   | 4.193807D+01 | 4.5304D-02  |
|   | 1.715217D+01 | 2.7232D-02  |
|   | 4.768204D+00 | -1.5880D-01 |
|   | 1.781925D+00 | -3.1982D-01 |
| S | 1 1.00       |             |
|   | 3.386647D-01 | 1.00000000  |
| S | 1 1.00       |             |
|   | 1.326649D-01 | 1.00000000  |
| S | 1 1.00       |             |
|   | 6.463289D-02 | 1.00000000  |
| P | 7 1.00       |             |
|   | 1.631865D+03 | 6.0339D-05  |
|   | 2.786509D+02 | 9.0933D-04  |
|   | 7.645439D+01 | 6.0515D-03  |
|   | 2.527413D+01 | 2.4440D-02  |
|   | 9.322672D+00 | 5.9536D-02  |
|   | 3.567954D+00 | 8.6276D-02  |
|   | 1.362871D+00 | 3.0239D-03  |
| P | 7 1.00       |             |
|   | 1.631865D+03 | 3.7407D-04  |
|   | 2.786509D+02 | 5.3117D-03  |
|   | 7.645439D+01 | 3.4379D-02  |
|   | 2.527413D+01 | 1.3692D-01  |
|   | 9.322672D+00 | 3.3067D-01  |
|   | 3.567954D+00 | 4.4178D-01  |
|   | 1.362871D+00 | 2.1890D-01  |
| P | 1 1.00       |             |
|   | 3.808971D-01 | 1.00000000  |
| P | 1 1.00       |             |

|      |              |            |
|------|--------------|------------|
|      | 1.060116D-01 | 1.00000000 |
| P    | 1 1.00       |            |
|      | 2.558277D-02 | 1.00000000 |
| D    | 1 1.00       |            |
|      | 2.584314D+00 | 1.00000000 |
| D    | 1 1.00       |            |
|      | 5.760276D-01 | 1.00000000 |
| D    | 1 1.00       |            |
|      | 1.632577D-01 | 1.00000000 |
| D    | 1 1.00       |            |
|      | 6.552082D-02 | 1.00000000 |
| **** |              |            |

The **aug-pecS-2** basis sets for **phosphorus** atom in Gaussian format, [7s6p5d2f]

|   |              |            |
|---|--------------|------------|
| P | 0            |            |
| S | 12 1.00      |            |
|   | 3.047447D+05 | 5.9741D-05 |
|   | 4.452317D+04 | 4.7390D-04 |
|   | 1.024494D+04 | 2.4057D-03 |
|   | 2.995194D+03 | 9.5460D-03 |
|   | 9.979339D+02 | 3.3268D-02 |
|   | 3.613183D+02 | 9.8679D-02 |
|   | 1.398529D+02 | 2.3513D-01 |
|   | 5.749685D+01 | 3.7565D-01 |
|   | 2.462460D+01 | 3.1592D-01 |
|   | 1.051605D+01 | 7.0672D-02 |
|   | 4.293991D+00 | 1.8235D-03 |
|   | 1.800446D+00 | 6.3013D-04 |
| S | 12 1.00      |            |
|   | 3.047447D+05 | 1.9953D-05 |

|              |             |
|--------------|-------------|
| 4.452317D+04 | 1.2845D-04  |
| 1.024494D+04 | 6.4622D-04  |
| 2.995194D+03 | 2.6595D-03  |
| 9.979339D+02 | 9.2826D-03  |
| 3.613183D+02 | 2.8877D-02  |
| 1.398529D+02 | 7.5834D-02  |
| 5.749685D+01 | 1.4910D-01  |
| 2.462460D+01 | 1.9192D-01  |
| 1.051605D+01 | -3.4788D-02 |
| 4.293991D+00 | -5.3547D-01 |
| 1.800446D+00 | -5.1834D-01 |
| S 12 1.00    |             |
| 3.047447D+05 | 3.0035D-06  |
| 4.452317D+04 | 3.0031D-05  |
| 1.024494D+04 | 1.5120D-04  |
| 2.995194D+03 | 6.1263D-04  |
| 9.979339D+02 | 2.1449D-03  |
| 3.613183D+02 | 6.7375D-03  |
| 1.398529D+02 | 1.7466D-02  |
| 5.749685D+01 | 3.5729D-02  |
| 2.462460D+01 | 4.5430D-02  |
| 1.051605D+01 | -7.6765D-03 |
| 4.293991D+00 | -1.7029D-01 |
| 1.800446D+00 | -2.6849D-01 |
| S 1 1.00     |             |
| 6.456697D-01 | 1.00000000  |
| S 1 1.00     |             |
| 3.085029D-01 | 1.00000000  |
| S 1 1.00     |             |
| 1.259483D-01 | 1.00000000  |

|   |   |              |            |
|---|---|--------------|------------|
| S | 1 | 1.00         |            |
|   |   | 7.866034D-02 | 1.00000000 |
| P | 7 | 1.00         |            |
|   |   | 2.501047D+03 | 1.7954D-04 |
|   |   | 4.125818D+02 | 2.7706D-03 |
|   |   | 1.085274D+02 | 1.9980D-02 |
|   |   | 3.560937D+01 | 8.7359D-02 |
|   |   | 1.326035D+01 | 2.5192D-01 |
|   |   | 5.157181D+00 | 4.3614D-01 |
|   |   | 2.023144D+00 | 3.6101D-01 |
| P | 7 | 1.00         |            |
|   |   | 2.501047D+03 | 3.0118D-05 |
|   |   | 4.125818D+02 | 4.8392D-04 |
|   |   | 1.085274D+02 | 3.3721D-03 |
|   |   | 3.560937D+01 | 1.5145D-02 |
|   |   | 1.326035D+01 | 4.4984D-02 |
|   |   | 5.157181D+00 | 7.9740D-02 |
|   |   | 2.023144D+00 | 6.7662D-02 |
| P | 1 | 1.00         |            |
|   |   | 6.701044D-01 | 1.00000000 |
| P | 1 | 1.00         |            |
|   |   | 2.568871D-01 | 1.00000000 |
| P | 1 | 1.00         |            |
|   |   | 8.404583D-02 | 1.00000000 |
| P | 1 | 1.00         |            |
|   |   | 2.452432D-02 | 1.00000000 |
| D | 1 | 1.00         |            |
|   |   | 4.501459D+00 | 1.00000000 |
| D | 1 | 1.00         |            |
|   |   | 1.126071D+00 | 1.00000000 |



D 1 1.00  
 3.989444D-01 1.00000000

D 1 1.00  
 1.545745D-01 1.00000000

D 1 1.00  
 4.976724D-02 1.00000000

F 1 1.00  
 5.004978D-01 1.00000000

F 1 1.00  
 5.458669D-02 1.00000000

\*\*\*\*

*Molecules used in theoretical analysis:*

**Neutral molecules:**

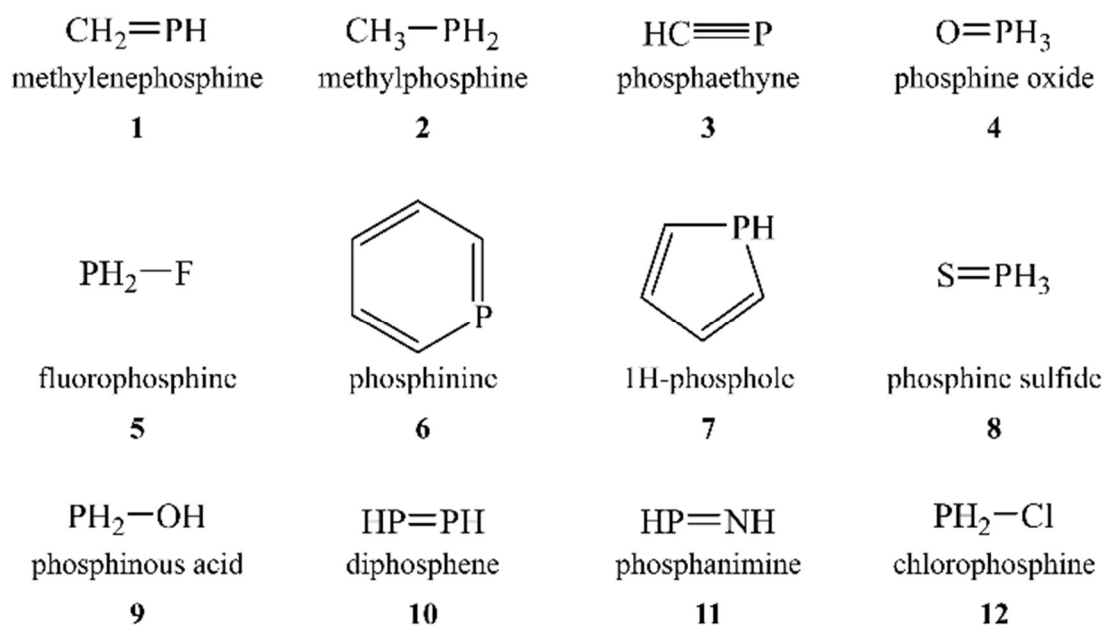

**Anions:** cyaphide anion  $[\text{P}\equiv\text{C}]^-$  (**13**), hydrogen phosphite anion  $[\text{HPO}_3]^{2-}$  (**14**), orthophosphate anion  $[\text{PO}_4]^{3-}$  (**15**), methylenephosphine anion  $[\text{CH}_2\text{P}]^-$  (**16**) and phosphine anion  $[\text{PH}_2]^-$  (**17**)

**Table S1.** Equilibrium geometries for neutral molecules **1-12** and anions **13-17** calculated at the DFT(M06-2X)/cc-pVQZ level of theory.

| #        | Cartesian Coordinates, Å |           |           |           |
|----------|--------------------------|-----------|-----------|-----------|
| <b>1</b> | C                        | 0.000000  | 0.000000  | 0.000000  |
|          | P                        | 0.000000  | 0.000000  | 1.650001  |
|          | H                        | 0.944541  | 0.000000  | -0.530507 |
|          | H                        | -0.884965 | 0.000000  | -0.621918 |
|          | H                        | -1.406919 | 0.000000  | 1.835076  |
| <b>2</b> | C                        | 0.000000  | 0.000000  | 0.000000  |
|          | P                        | 0.000000  | 0.000000  | 1.845354  |
|          | H                        | 1.395494  | 0.000000  | 2.035990  |
|          | H                        | -0.108199 | -1.391294 | 2.035990  |
|          | H                        | -1.010665 | -0.200586 | -0.349099 |
|          | H                        | 0.278343  | 0.992070  | -0.349099 |
|          | H                        | 0.676271  | -0.730905 | -0.432458 |
| <b>3</b> | C                        | 0.000000  | 0.000000  | 0.000000  |
|          | P                        | 0.000000  | 0.000000  | 1.541463  |
|          | H                        | 0.000000  | 0.000000  | -1.086501 |
| <b>4</b> | O                        | -0.000367 | -0.000008 | 0.034520  |
|          | P                        | 0.000146  | -0.000004 | 1.504616  |
|          | H                        | 1.260034  | 0.000031  | 2.141949  |
|          | H                        | -0.629493 | 1.090883  | 2.142605  |
|          | H                        | -0.629435 | -1.090922 | 2.142611  |
| <b>5</b> | P                        | -0.028385 | 0.002394  | 1.534141  |
|          | F                        | 1.456627  | -0.008599 | 2.145613  |
|          | H                        | -0.535160 | 1.110572  | 2.267621  |
|          | H                        | -0.620982 | -0.920632 | 2.439529  |
| <b>6</b> | C                        | -0.095493 | -0.000383 | -0.051544 |
|          | C                        | -0.010978 | -0.000263 | 1.334201  |
|          | C                        | 1.191024  | 0.000102  | 2.020862  |
|          | P                        | 2.758407  | 0.000413  | 1.294605  |
|          | C                        | 2.321985  | 0.000233  | -0.376667 |
|          | C                        | 1.027432  | -0.000139 | -0.867504 |
|          | H                        | -1.073140 | -0.000658 | -0.512557 |
|          | H                        | -0.933492 | -0.000445 | 1.901739  |
|          | H                        | 1.156535  | 0.000207  | 3.103216  |
|          | H                        | 3.135118  | 0.000396  | -1.091848 |
|          | H                        | 0.878914  | -0.000242 | -1.940391 |
| <b>7</b> | C                        | 0.039539  | -0.039290 | 0.088204  |
|          | C                        | 0.007918  | 0.189970  | 1.413499  |
|          | P                        | 1.649171  | 0.637665  | 2.000348  |
|          | C                        | 2.358220  | 0.189973  | 0.408068  |
|          | C                        | 1.377898  | -0.039300 | -0.484328 |
|          | H                        | -0.841974 | -0.210665 | -0.514168 |
|          | H                        | -0.888310 | 0.238343  | 2.010933  |
|          | H                        | 1.980374  | -0.494357 | 2.774575  |
|          | H                        | 3.409245  | 0.238347  | 0.172492  |
|          | H                        | 1.551033  | -0.210680 | -1.537864 |

|           |    |           |           |           |
|-----------|----|-----------|-----------|-----------|
| <b>8</b>  | S  | 0.000365  | 0.000257  | 0.046153  |
|           | P  | 0.000173  | -0.000261 | 1.980913  |
|           | H  | 1.246019  | -0.003463 | 2.630372  |
|           | H  | -0.620936 | 1.080836  | 2.630999  |
|           | H  | -0.625620 | -1.077369 | 2.631015  |
| <b>9</b>  | P  | -0.155475 | 0.510294  | 0.052790  |
|           | O  | -0.320633 | -0.358783 | 1.452496  |
|           | H  | 1.037864  | -0.084885 | -0.418441 |
|           | H  | -0.962634 | -0.293628 | -0.785009 |
|           | H  | -0.516150 | 0.227002  | 2.184497  |
| <b>10</b> | P  | -0.232578 | 0.000003  | 0.081851  |
|           | P  | 0.232578  | 0.000002  | 2.038349  |
|           | H  | 1.120791  | -0.000002 | -0.343836 |
|           | H  | -1.120791 | -0.000001 | 2.464036  |
| <b>11</b> | P  | -0.158597 | 0.000000  | -0.008122 |
|           | N  | 0.110956  | -0.000001 | 1.535267  |
|           | H  | 1.197549  | 0.000001  | -0.456876 |
|           | H  | -0.765122 | 0.000003  | 2.055598  |
| <b>12</b> | P  | 0.003182  | 0.610184  | -0.051561 |
|           | Cl | -0.006385 | -0.160819 | 1.871241  |
|           | H  | 1.021879  | -0.230238 | -0.553711 |
|           | H  | -1.018676 | -0.220400 | -0.563145 |
| <b>13</b> | C  | 0.000000  | 0.000000  | -1.134236 |
|           | P  | 0.000000  | 0.000000  | 0.453694  |
| <b>14</b> | P  | 0.000019  | 0.000000  | 0.173829  |
|           | O  | -0.746541 | 1.285022  | -0.177271 |
|           | O  | -0.739652 | -1.288999 | -0.177271 |
|           | O  | 1.486127  | 0.003977  | -0.177318 |
|           | H  | 0.000253  | 0.000001  | 1.647448  |
| <b>15</b> | P  | 0.000002  | -0.000006 | 0.000008  |
|           | O  | 0.954406  | -0.985443 | 0.772863  |
|           | O  | 0.261749  | 1.474284  | 0.487148  |
|           | O  | 0.282730  | -0.099954 | -1.545659 |
|           | O  | -1.498888 | -0.388876 | 0.285633  |
| <b>16</b> | C  | 0.000003  | -1.041662 | 0.000000  |
|           | P  | 0.000003  | 0.637232  | -0.000000 |
|           | H  | -0.000029 | -1.654257 | 0.907039  |
|           | H  | -0.000029 | -1.654257 | -0.907039 |
| <b>17</b> | P  | 0.000000  | 0.000000  | 0.116959  |
|           | H  | 0.000000  | 1.023932  | -0.877191 |
|           | H  | -0.000000 | -1.023932 | -0.877191 |

Molecules used in experimental analysis:

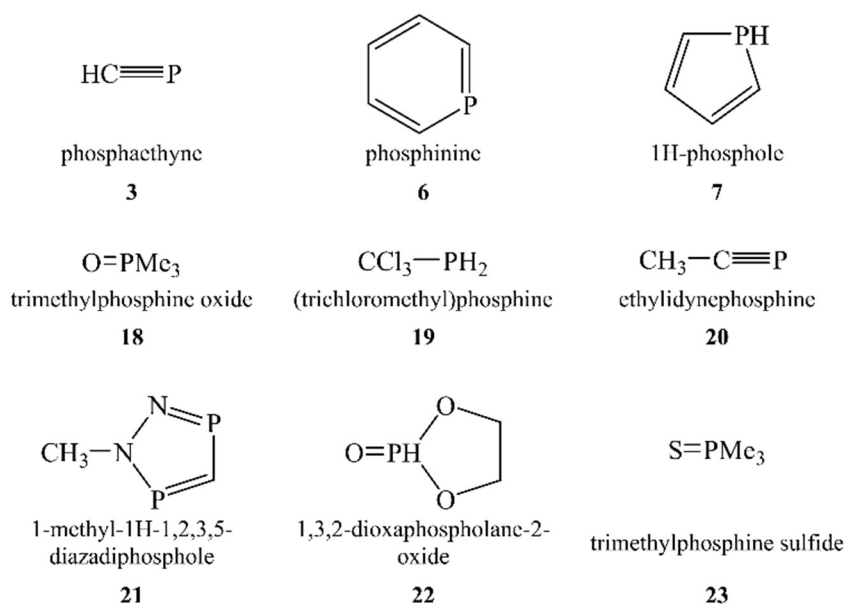

**Table S2.** Equilibrium geometries for molecules **3, 6, 7, 18-23** calculated at the DFT(M06-2X)/cc-pV5Z level of theory.

| #        | Cartesian Coordinates, Å |           |           |           |
|----------|--------------------------|-----------|-----------|-----------|
| <b>3</b> | P                        | 0.000000  | 0.000000  | 0.534076  |
|          | C                        | 0.000000  | 0.000000  | -0.991396 |
|          | H                        | 0.000000  | 0.000000  | -2.062772 |
| <b>6</b> | P                        | 0.000000  | 0.000000  | 1.473854  |
|          | C                        | 0.000000  | 1.326974  | 0.370561  |
|          | C                        | 0.000000  | 1.218126  | -1.010523 |
|          | C                        | 0.000000  | 0.000000  | -1.677925 |
|          | C                        | 0.000000  | -1.218126 | -1.010523 |
|          | C                        | 0.000000  | -1.326974 | 0.370561  |
|          | H                        | 0.000000  | 2.320367  | 0.801341  |
|          | H                        | 0.000000  | 2.124947  | -1.602372 |
|          | H                        | 0.000000  | 0.000000  | -2.758665 |
|          | H                        | 0.000000  | -2.124947 | -1.602372 |
|          | H                        | 0.000000  | -2.320367 | 0.801341  |
| <b>7</b> | P                        | 0.167540  | 1.199679  | 0.000000  |
|          | C                        | -0.051850 | -0.043090 | -1.279255 |
|          | C                        | -0.051850 | -1.272090 | -0.728102 |
|          | C                        | -0.051850 | -1.272090 | 0.728102  |
|          | C                        | -0.051850 | -0.043090 | 1.279255  |
|          | H                        | -1.085251 | 1.844385  | 0.000000  |
|          | H                        | -0.040992 | 0.160644  | -2.338119 |
|          | H                        | -0.050729 | -2.189356 | -1.300666 |
|          | H                        | -0.050729 | -2.189356 | 1.300666  |
|          | H                        | -0.040992 | 0.160644  | 2.338119  |

|           |    |           |           |           |
|-----------|----|-----------|-----------|-----------|
| <b>18</b> | P  | 0.000249  | -0.000182 | 0.176265  |
|           | O  | 0.000777  | -0.001875 | 1.659879  |
|           | C  | 1.645259  | -0.182531 | -0.545714 |
|           | C  | -0.664344 | 1.516296  | -0.543333 |
|           | C  | -0.981752 | -1.331954 | -0.545818 |
|           | H  | 2.077294  | -1.121060 | -0.204582 |
|           | H  | 1.602543  | -0.176662 | -1.633143 |
|           | H  | 2.273050  | 0.637370  | -0.203040 |
|           | H  | -1.685952 | 1.652484  | -0.194684 |
|           | H  | -0.064559 | 2.359603  | -0.207276 |
|           | H  | -0.654165 | 1.474124  | -1.630718 |
|           | H  | -2.008224 | -1.240497 | -0.196783 |
|           | H  | -0.963070 | -1.291807 | -1.633151 |
|           | H  | -0.581851 | -2.286686 | -0.210446 |
| <b>19</b> | P  | 1.855813  | 0.139149  | 0.000000  |
|           | C  | -0.017185 | -0.006367 | 0.000000  |
|           | H  | 2.037117  | -0.800132 | 1.035109  |
|           | H  | 2.037117  | -0.800132 | -1.035109 |
|           | Cl | -0.623692 | 0.823631  | -1.449925 |
|           | Cl | -0.623692 | -1.673660 | 0.000000  |
|           | Cl | -0.623692 | 0.823631  | 1.449925  |
| <b>20</b> | P  | 0.000003  | 0.000001  | 0.237963  |
|           | C  | 0.000003  | 0.000001  | 1.771380  |
|           | C  | 0.000003  | 0.000001  | 3.229747  |
|           | H  | 1.019440  | -0.000054 | 3.613794  |
|           | H  | -0.509668 | 0.882886  | 3.613794  |
|           | H  | -0.509762 | -0.882830 | 3.613794  |
| <b>21</b> | C  | -0.565223 | -1.483137 | 0.000000  |
|           | P  | 1.161568  | -1.304101 | 0.000000  |
|           | P  | -1.410546 | -0.013410 | 0.000000  |
|           | N  | 0.000000  | 0.909385  | 0.000000  |
|           | N  | 1.184440  | 0.331418  | 0.000000  |
|           | C  | -0.010233 | 2.371284  | 0.000000  |
|           | H  | -1.068439 | -2.438369 | 0.000000  |
|           | H  | 0.501559  | 2.733380  | 0.887425  |
|           | H  | 0.501559  | 2.733380  | -0.887425 |
|           | H  | -1.038353 | 2.719775  | 0.000000  |
| <b>22</b> | C  | -1.569006 | -0.718402 | -0.011383 |
|           | C  | -1.471235 | 0.776766  | -0.303979 |
|           | O  | -0.212504 | 1.177077  | 0.258502  |
|           | O  | -0.217503 | -1.192371 | -0.065584 |
|           | P  | 0.825421  | -0.036051 | 0.282517  |
|           | O  | 2.001511  | 0.041310  | -0.568374 |
|           | H  | -2.149468 | -1.255366 | -0.754305 |
|           | H  | -1.974074 | -0.907343 | 0.981724  |
|           | H  | -2.258259 | 1.350909  | 0.173276  |
|           | H  | -1.459337 | 0.977660  | -1.373376 |
|           | H  | 1.129226  | -0.183414 | 1.630752  |
|           |    |           |           |           |

|           |   |           |           |           |
|-----------|---|-----------|-----------|-----------|
| <b>23</b> | P | 0.182971  | -0.000118 | 0.000173  |
|           | C | 0.911232  | 0.821763  | -1.436521 |
|           | C | 0.903064  | -1.658992 | 0.006135  |
|           | C | 0.910349  | 0.832377  | 1.430674  |
|           | H | 0.564164  | 1.851887  | -1.463970 |
|           | H | 1.997993  | 0.799741  | -1.376147 |
|           | H | 0.580548  | 0.311660  | -2.338023 |
|           | H | 0.561722  | -2.185895 | 0.893889  |
|           | H | 0.560311  | -2.192107 | -0.877429 |
|           | H | 1.990220  | -1.602588 | 0.005719  |
|           | H | 0.573364  | 0.334891  | 2.336858  |
|           | H | 1.997054  | 0.801141  | 1.374173  |
|           | H | 0.570475  | 1.865046  | 1.445183  |
|           | S | -1.780518 | 0.002945  | -0.000286 |

**Table S3.**  $^{31}\text{P}$  NMR shielding constants (in ppm) and solvent corrections ( $\Delta\text{sol}$ ) of molecules **1-12** calculated at the GIAO-DFT(B97-2)/**aug-pcS-4** level of theory.

| #         | Molecule                        | Solvated phase | Gas phase | $\Delta\text{sol}$ |
|-----------|---------------------------------|----------------|-----------|--------------------|
| <b>1</b>  | CH <sub>2</sub> PH              | 70.36          | 64.11     | 6.24               |
| <b>2</b>  | CH <sub>3</sub> PH <sub>2</sub> | 487.42         | 486.91    | 0.51               |
| <b>3</b>  | HCP                             | 336.99         | 339.57    | -2.59              |
| <b>4</b>  | OPH <sub>3</sub>                | 354.83         | 367.21    | -12.38             |
| <b>5</b>  | PH <sub>2</sub> F               | 204.31         | 208.81    | -4.50              |
| <b>6</b>  | Phosphinine                     | 103.42         | 91.15     | 12.27              |
| <b>7</b>  | 1H-phosphole                    | 365.78         | 365.89    | -0.11              |
| <b>8</b>  | SPH <sub>3</sub>                | 385.39         | 392.07    | -6.68              |
| <b>9</b>  | PH <sub>2</sub> OH              | 278.15         | 276.63    | 1.52               |
| <b>10</b> | P <sub>2</sub> H <sub>2</sub>   | -243.93        | -248.69   | 4.77               |
| <b>11</b> | HP-NH                           | -280.42        | -280.45   | 0.03               |
| <b>12</b> | PH <sub>2</sub> Cl              | 350.47         | 354.59    | -4.12              |

**Table S4.**  $^{31}\text{P}$  NMR shielding constants (in ppm) and solvent corrections ( $\Delta\text{sol}$ ) of molecules **1-12** calculated at the GIAO-DFT(B97-2)/**cc-pVDZ** level of theory.

| #        | Molecule                        | Solvated phase | Gas phase | $\Delta\text{sol}$ |
|----------|---------------------------------|----------------|-----------|--------------------|
| <b>1</b> | CH <sub>2</sub> PH              | 165.56         | 158.15    | 7.40               |
| <b>2</b> | CH <sub>3</sub> PH <sub>2</sub> | 558.64         | 555.56    | 3.09               |
| <b>3</b> | HCP                             | 396.25         | 397.49    | -1.24              |
| <b>4</b> | OPH <sub>3</sub>                | 453.32         | 461.40    | -8.08              |
| <b>5</b> | PH <sub>2</sub> F               | 310.74         | 313.64    | -2.90              |
| <b>6</b> | Phosphinine                     | 197.41         | 186.25    | 11.16              |
| <b>7</b> | 1H-phosphole                    | 446.45         | 445.42    | 1.03               |
| <b>8</b> | SPH <sub>3</sub>                | 474.85         | 479.07    | -4.22              |
| <b>9</b> | PH <sub>2</sub> OH              | 381.94         | 379.64    | 2.29               |

|    |                               |         |         |       |
|----|-------------------------------|---------|---------|-------|
| 10 | P <sub>2</sub> H <sub>2</sub> | -145.28 | -151.67 | 6.39  |
| 11 | HP-NH                         | -148.73 | -151.90 | 3.17  |
| 12 | PH <sub>2</sub> Cl            | 426.80  | 430.81  | -4.01 |

**Table S5.** <sup>31</sup>P NMR shielding constants (in ppm) and solvent corrections ( $\Delta_{\text{sol}}$ ) of molecules 1-12 calculated at the GIAO-DFT(B97-2)/cc-pVTZ level of theory.

| #  | Molecule                        | Solvated phase | Gas phase | $\Delta_{\text{sol}}$ |
|----|---------------------------------|----------------|-----------|-----------------------|
| 1  | CH <sub>2</sub> PH              | 105.80         | 98.88     | 6.92                  |
| 2  | CH <sub>3</sub> PH <sub>2</sub> | 514.68         | 512.38    | 2.30                  |
| 3  | HCP                             | 349.44         | 352.48    | -3.05                 |
| 4  | OPH <sub>3</sub>                | 389.30         | 400.23    | -10.93                |
| 5  | PH <sub>2</sub> F               | 242.12         | 245.70    | -3.58                 |
| 6  | Phosphinine                     | 139.94         | 127.71    | 12.23                 |
| 7  | 1H-phosphole                    | 396.21         | 395.64    | 0.57                  |
| 8  | SPH <sub>3</sub>                | 418.41         | 425.12    | -6.71                 |
| 9  | PH <sub>2</sub> OH              | 313.92         | 311.39    | 2.52                  |
| 10 | P <sub>2</sub> H <sub>2</sub>   | -205.08        | -210.16   | 5.08                  |
| 11 | HP-NH                           | -231.44        | -233.25   | 1.81                  |
| 12 | PH <sub>2</sub> Cl              | 379.25         | 383.52    | -4.27                 |

**Table S6.** <sup>31</sup>P NMR shielding constants (in ppm) and solvent corrections ( $\Delta_{\text{sol}}$ ) of molecules 1-12 calculated at the GIAO-DFT(B97-2)/cc-pVQZ level of theory.

| #  | Molecule                        | Solvated phase | Gas phase | $\Delta_{\text{sol}}$ |
|----|---------------------------------|----------------|-----------|-----------------------|
| 1  | CH <sub>2</sub> PH              | 127.78         | 121.66    | 6.12                  |
| 2  | CH <sub>3</sub> PH <sub>2</sub> | 521.77         | 520.69    | 1.08                  |
| 3  | HCP                             | 366.80         | 368.90    | -2.10                 |
| 4  | OPH <sub>3</sub>                | 395.12         | 406.05    | -10.93                |
| 5  | PH <sub>2</sub> F               | 257.73         | 261.75    | -4.02                 |
| 6  | Phosphinine                     | 161.50         | 149.92    | 11.58                 |
| 7  | 1H-phosphole                    | 410.69         | 410.71    | -0.01                 |
| 8  | SPH <sub>3</sub>                | 424.97         | 431.07    | -6.09                 |
| 9  | PH <sub>2</sub> OH              | 327.08         | 325.15    | 1.93                  |
| 10 | P <sub>2</sub> H <sub>2</sub>   | -171.32        | -175.96   | 4.64                  |
| 11 | HP-NH                           | -200.99        | -201.69   | 0.70                  |
| 12 | PH <sub>2</sub> Cl              | 392.31         | 396.26    | -3.95                 |

**Table S7.** <sup>31</sup>P NMR shielding constants (in ppm) and solvent corrections ( $\Delta_{\text{sol}}$ ) of molecules 1-12 calculated at the GIAO-DFT(B97-2)/cc-pV5Z level of theory.

| # | Molecule           | Solvated phase | Gas phase | $\Delta_{\text{sol}}$ |
|---|--------------------|----------------|-----------|-----------------------|
| 1 | CH <sub>2</sub> PH | 65.64          | 59.18     | 6.45                  |

|    |                                 |         |         |        |
|----|---------------------------------|---------|---------|--------|
| 2  | CH <sub>3</sub> PH <sub>2</sub> | 488.07  | 487.17  | 0.89   |
| 3  | HCP                             | 332.21  | 334.80  | -2.58  |
| 4  | OPH <sub>3</sub>                | 356.59  | 369.10  | -12.51 |
| 5  | PH <sub>2</sub> F               | 203.46  | 207.98  | -4.52  |
| 6  | Phosphinine                     | 99.54   | 87.35   | 12.19  |
| 7  | 1H-phosphole                    | 364.44  | 364.44  | -0.01  |
| 8  | SPH <sub>3</sub>                | 386.08  | 392.79  | -6.71  |
| 9  | PH <sub>2</sub> OH              | 277.54  | 275.93  | 1.61   |
| 10 | P <sub>2</sub> H <sub>2</sub>   | -253.27 | -258.32 | 5.05   |
| 11 | HP-NH                           | -286.76 | -286.85 | 0.10   |
| 12 | PH <sub>2</sub> Cl              | 349.47  | 353.63  | -4.16  |

**Table S8.** <sup>31</sup>P NMR shielding constants (in ppm) and solvent corrections ( $\Delta_{\text{sol}}$ ) of molecules 1-12 calculated at the GIAO-DFT(B97-2)/aug-cc-pVDZ level of theory.

| #  | Molecule                        | Solvated phase | Gas phase | $\Delta_{\text{sol}}$ |
|----|---------------------------------|----------------|-----------|-----------------------|
| 1  | CH <sub>2</sub> PH              | 163.79         | 156.71    | 7.09                  |
| 2  | CH <sub>3</sub> PH <sub>2</sub> | 557.31         | 556.39    | 0.92                  |
| 3  | HCP                             | 394.32         | 395.93    | -1.61                 |
| 4  | OPH <sub>3</sub>                | 451.51         | 461.82    | -10.30                |
| 5  | PH <sub>2</sub> F               | 298.33         | 303.47    | -5.13                 |
| 6  | Phosphinine                     | 194.12         | 181.88    | 12.25                 |
| 7  | 1H-phosphole                    | 445.43         | 445.28    | 0.15                  |
| 8  | SPH <sub>3</sub>                | 477.25         | 482.86    | -5.62                 |
| 9  | PH <sub>2</sub> OH              | 371.80         | 370.74    | 1.05                  |
| 10 | P <sub>2</sub> H <sub>2</sub>   | -141.49        | -145.31   | 3.83                  |
| 11 | HP-NH                           | -160.50        | -160.08   | -0.41                 |
| 12 | PH <sub>2</sub> Cl              | 424.21         | 429.12    | -4.91                 |

**Table S9.** <sup>31</sup>P NMR shielding constants (in ppm) and solvent corrections ( $\Delta_{\text{sol}}$ ) of molecules 1-12 calculated at the GIAO-DFT(B97-2)/aug-cc-pVTZ level of theory.

| #  | Molecule                        | Solvated phase | Gas phase | $\Delta_{\text{sol}}$ |
|----|---------------------------------|----------------|-----------|-----------------------|
| 1  | CH <sub>2</sub> PH              | 101.88         | 95.43     | 6.45                  |
| 2  | CH <sub>3</sub> PH <sub>2</sub> | 509.52         | 508.54    | 0.98                  |
| 3  | HCP                             | 358.07         | 360.37    | -2.30                 |
| 4  | OPH <sub>3</sub>                | 389.12         | 401.24    | -12.12                |
| 5  | PH <sub>2</sub> F               | 243.08         | 247.65    | -4.57                 |
| 6  | Phosphinine                     | 134.37         | 122.63    | 11.73                 |
| 7  | 1H-phosphole                    | 389.85         | 389.87    | -0.02                 |
| 8  | SPH <sub>3</sub>                | 418.75         | 425.31    | -6.56                 |
| 9  | PH <sub>2</sub> OH              | 312.46         | 311.06    | 1.40                  |
| 10 | P <sub>2</sub> H <sub>2</sub>   | -201.22        | -205.93   | 4.71                  |



|           |                    |         |         |       |
|-----------|--------------------|---------|---------|-------|
| <b>11</b> | HP-NH              | -233.77 | -233.66 | -0.11 |
| <b>12</b> | PH <sub>2</sub> Cl | 379.14  | 383.47  | -4.33 |

**Table S10.** <sup>31</sup>P NMR shielding constants (in ppm) and solvent corrections ( $\Delta$ sol) of molecules **1-12** calculated at the GIAO-DFT(B97-2)/**aug-cc-pVQZ** level of theory.

| #         | Molecule                        | Solvated phase | Gas phase | $\Delta$ sol |
|-----------|---------------------------------|----------------|-----------|--------------|
| <b>1</b>  | CH <sub>2</sub> PH              | 123.60         | 117.40    | 6.20         |
| <b>2</b>  | CH <sub>3</sub> PH <sub>2</sub> | 517.31         | 516.58    | 0.73         |
| <b>3</b>  | HCP                             | 366.99         | 369.15    | -2.15        |
| <b>4</b>  | OPH <sub>3</sub>                | 394.39         | 405.64    | -11.25       |
| <b>5</b>  | PH <sub>2</sub> F               | 254.21         | 258.51    | -4.30        |
| <b>6</b>  | Phosphinine                     | 144.18         | 132.58    | 11.60        |
| <b>7</b>  | 1H-phosphole                    | 403.38         | 403.36    | 0.03         |
| <b>8</b>  | SPH <sub>3</sub>                | 427.85         | 434.00    | -6.15        |
| <b>9</b>  | PH <sub>2</sub> OH              | 323.62         | 322.26    | 1.36         |
| <b>10</b> | P <sub>2</sub> H <sub>2</sub>   | -172.10        | -176.80   | 4.69         |
| <b>11</b> | HP-NH                           | -206.61        | -206.49   | -0.13        |
| <b>12</b> | PH <sub>2</sub> Cl              | 389.73         | 393.70    | -3.97        |

**Table S11.** <sup>31</sup>P NMR shielding constants (in ppm) and solvent corrections ( $\Delta$ sol) of molecules **1-12** calculated at the GIAO-DFT(B97-2)/**aug-cc-pV5Z** level of theory.

| #         | Molecule                        | Solvated phase | Gas phase | $\Delta$ sol |
|-----------|---------------------------------|----------------|-----------|--------------|
| <b>1</b>  | CH <sub>2</sub> PH              | 67.49          | 61.08     | 6.40         |
| <b>2</b>  | CH <sub>3</sub> PH <sub>2</sub> | 487.77         | 487.07    | 0.71         |
| <b>3</b>  | HCP                             | 332.58         | 335.18    | -2.59        |
| <b>4</b>  | OPH <sub>3</sub>                | 356.49         | 369.01    | -12.52       |
| <b>5</b>  | PH <sub>2</sub> F               | 203.39         | 207.94    | -4.55        |
| <b>6</b>  | Phosphinine                     | 98.24          | 86.07     | 12.17        |
| <b>7</b>  | 1H-phosphole                    | 361.81         | 361.87    | -0.06        |
| <b>8</b>  | SPH <sub>3</sub>                | 385.90         | 392.72    | -6.81        |
| <b>9</b>  | PH <sub>2</sub> OH              | 277.17         | 275.64    | 1.53         |
| <b>10</b> | P <sub>2</sub> H <sub>2</sub>   | -252.15        | -257.03   | 4.88         |
| <b>11</b> | HP-NH                           | -285.83        | -285.85   | 0.01         |
| <b>12</b> | PH <sub>2</sub> Cl              | 349.37         | 353.55    | -4.18        |

**Table S12.** <sup>31</sup>P NMR shielding constants (in ppm) and solvent corrections ( $\Delta$ sol) of molecules **1-12** calculated at the GIAO-DFT(B97-2)/**pecS-1** level of theory.

| #        | Molecule                        | Solvated phase | Gas phase | $\Delta$ sol |
|----------|---------------------------------|----------------|-----------|--------------|
| <b>1</b> | CH <sub>2</sub> PH              | 70.49          | 66.56     | 3.93         |
| <b>2</b> | CH <sub>3</sub> PH <sub>2</sub> | 492.01         | 491.13    | 0.88         |

|    |                               |         |         |        |
|----|-------------------------------|---------|---------|--------|
| 3  | HCP                           | 337.21  | 341.19  | -3.98  |
| 4  | OPH <sub>3</sub>              | 361.67  | 374.12  | -12.45 |
| 5  | PH <sub>2</sub> F             | 211.75  | 215.68  | -3.92  |
| 6  | Phosphinine                   | 103.80  | 93.52   | 10.28  |
| 7  | 1H-phosphole                  | 364.34  | 364.34  | 0.00   |
| 8  | SPH <sub>3</sub>              | 390.30  | 397.75  | -7.44  |
| 9  | PH <sub>2</sub> OH            | 284.72  | 282.34  | 2.38   |
| 10 | P <sub>2</sub> H <sub>2</sub> | -235.40 | -236.84 | 1.43   |
| 11 | HP-NH                         | -270.12 | -272.69 | 2.56   |
| 12 | PH <sub>2</sub> Cl            | 353.22  | 357.45  | -4.24  |

**Table S13.** <sup>31</sup>P NMR shielding constants (in ppm) and solvent corrections ( $\Delta_{\text{sol}}$ ) of molecules 1-12 calculated at the GIAO-DFT(B97-2)/**pecS-2** level of theory.

| #  | Molecule                        | Solvated phase | Gas phase | $\Delta_{\text{sol}}$ |
|----|---------------------------------|----------------|-----------|-----------------------|
| 1  | CH <sub>2</sub> PH              | 70.50          | 64.72     | 5.78                  |
| 2  | CH <sub>3</sub> PH <sub>2</sub> | 490.32         | 489.46    | 0.86                  |
| 3  | HCP                             | 337.12         | 340.17    | -3.05                 |
| 4  | OPH <sub>3</sub>                | 356.82         | 369.01    | -12.19                |
| 5  | PH <sub>2</sub> F               | 206.41         | 210.64    | -4.23                 |
| 6  | Phosphinine                     | 105.17         | 93.49     | 11.68                 |
| 7  | 1H-phosphole                    | 366.88         | 366.94    | -0.06                 |
| 8  | SPH <sub>3</sub>                | 387.50         | 393.96    | -6.46                 |
| 9  | PH <sub>2</sub> OH              | 280.61         | 278.76    | 1.85                  |
| 10 | P <sub>2</sub> H <sub>2</sub>   | -247.16        | -251.68   | 4.52                  |
| 11 | HP-NH                           | -283.71        | -284.79   | 1.08                  |
| 12 | PH <sub>2</sub> Cl              | 350.70         | 355.14    | -4.44                 |

**Table S14.** <sup>31</sup>P NMR shielding constants (in ppm) and solvent corrections ( $\Delta_{\text{sol}}$ ) of molecules 1-12 calculated at the GIAO-DFT(B97-2)/**aug-pecS-1-mixed** level of theory.

| #  | Molecule                        | Solvated phase | Gas phase | $\Delta_{\text{sol}}$ |
|----|---------------------------------|----------------|-----------|-----------------------|
| 1  | CH <sub>2</sub> PH              | 78.33          | 73.08     | 5.25                  |
| 2  | CH <sub>3</sub> PH <sub>2</sub> | 491.91         | 491.43    | 0.47                  |
| 3  | HCP                             | 342.02         | 344.91    | -2.90                 |
| 4  | OPH <sub>3</sub>                | 360.31         | 373.08    | -12.77                |
| 5  | PH <sub>2</sub> F               | 207.60         | 212.49    | -4.88                 |
| 6  | Phosphinine                     | 112.61         | 101.15    | 11.46                 |
| 7  | 1H-phosphole                    | 371.76         | 372.10    | -0.34                 |
| 8  | SPH <sub>3</sub>                | 388.77         | 396.06    | -7.29                 |
| 9  | PH <sub>2</sub> OH              | 283.54         | 282.29    | 1.25                  |
| 10 | P <sub>2</sub> H <sub>2</sub>   | -233.81        | -235.77   | 1.96                  |
| 11 | HP-NH                           | -270.68        | -269.21   | -1.47                 |

|    |                    |        |        |       |
|----|--------------------|--------|--------|-------|
| 12 | PH <sub>2</sub> Cl | 349.43 | 353.90 | -4.48 |
|----|--------------------|--------|--------|-------|

**Table S15.** <sup>31</sup>P NMR shielding constants (in ppm) and solvent corrections ( $\Delta$ sol) of molecules 1-12 calculated at the GIAO-DFT(B97-2)/**aug-pecS-2-mixed** level of theory.

| #  | Molecule                        | Solvated phase | Gas phase | $\Delta$ sol |
|----|---------------------------------|----------------|-----------|--------------|
| 1  | CH <sub>2</sub> PH              | 69.99          | 63.86     | 6.14         |
| 2  | CH <sub>3</sub> PH <sub>2</sub> | 488.07         | 487.43    | 0.63         |
| 3  | HCP                             | 336.41         | 339.08    | -2.67        |
| 4  | OPH <sub>3</sub>                | 356.25         | 368.65    | -12.40       |
| 5  | PH <sub>2</sub> F               | 205.16         | 209.72    | -4.56        |
| 6  | Phosphinine                     | 103.18         | 91.23     | 11.95        |
| 7  | 1H-phosphole                    | 366.11         | 366.22    | -0.11        |
| 8  | SPH <sub>3</sub>                | 385.75         | 392.52    | -6.77        |
| 9  | PH <sub>2</sub> OH              | 279.11         | 277.64    | 1.47         |
| 10 | P <sub>2</sub> H <sub>2</sub>   | -244.45        | -248.99   | 4.53         |
| 11 | HP-NH                           | -280.09        | -280.09   | 0.00         |
| 12 | PH <sub>2</sub> Cl              | 349.33         | 353.59    | -4.26        |

**Table S16.** <sup>31</sup>P NMR shielding constants (in ppm) and solvent corrections ( $\Delta$ sol) of molecules 1-12 calculated at the GIAO-DFT(B97-2)/**6-31G(d,p)** level of theory.

| #  | Molecule                        | Solvated phase | Gas phase | $\Delta$ sol |
|----|---------------------------------|----------------|-----------|--------------|
| 1  | CH <sub>2</sub> PH              | 162.40         | 152.73    | 9.67         |
| 2  | CH <sub>3</sub> PH <sub>2</sub> | 540.32         | 536.58    | 3.74         |
| 3  | HCP                             | 404.17         | 404.16    | 0.00         |
| 4  | OPH <sub>3</sub>                | 418.61         | 429.46    | -10.86       |
| 5  | PH <sub>2</sub> F               | 277.93         | 280.97    | -3.04        |
| 6  | Phosphinine                     | 194.41         | 181.75    | 12.66        |
| 7  | 1H-phosphole                    | 430.73         | 430.14    | 0.59         |
| 8  | SPH <sub>3</sub>                | 445.38         | 452.80    | -7.42        |
| 9  | PH <sub>2</sub> OH              | 351.29         | 349.01    | 2.28         |
| 10 | P <sub>2</sub> H <sub>2</sub>   | -172.33        | -181.17   | 8.84         |
| 11 | HP-NH                           | -160.54        | -163.08   | 2.54         |
| 12 | PH <sub>2</sub> Cl              | 400.67         | 406.06    | -5.39        |

**Table S17.** <sup>31</sup>P NMR shielding constants (in ppm) and solvent corrections ( $\Delta$ sol) of molecules 1-12 calculated at the GIAO-DFT(B97-2)/**6-311G(d,p)** level of theory.

| # | Molecule                        | Solvated phase | Gas phase | $\Delta$ sol |
|---|---------------------------------|----------------|-----------|--------------|
| 1 | CH <sub>2</sub> PH              | 78.90          | 71.90     | 7.00         |
| 2 | CH <sub>3</sub> PH <sub>2</sub> | 503.46         | 500.17    | 3.29         |
| 3 | HCP                             | 328.43         | 331.56    | -3.14        |

|    |                               |         |         |        |
|----|-------------------------------|---------|---------|--------|
| 4  | OPH <sub>3</sub>              | 380.27  | 392.17  | -11.90 |
| 5  | PH <sub>2</sub> F             | 221.31  | 226.81  | -5.50  |
| 6  | Phosphinine                   | 116.58  | 103.91  | 12.67  |
| 7  | 1H-phosphole                  | 380.32  | 380.00  | 0.32   |
| 8  | SPH <sub>3</sub>              | 410.86  | 418.30  | -7.44  |
| 9  | PH <sub>2</sub> OH            | 297.06  | 295.45  | 1.61   |
| 10 | P <sub>2</sub> H <sub>2</sub> | -264.59 | -275.89 | 11.30  |
| 11 | HP-NH                         | -268.79 | -269.81 | 1.02   |
| 12 | PH <sub>2</sub> Cl            | 354.99  | 362.54  | -7.55  |

**Table S18.** <sup>31</sup>P NMR shielding constants (in ppm) and solvent corrections ( $\Delta$ sol) of molecules 1-12 calculated at the GIAO-DFT(B97-2)/6-31++G(d,p) level of theory.

| #  | Molecule                        | Solvated phase | Gas phase | $\Delta$ sol |
|----|---------------------------------|----------------|-----------|--------------|
| 1  | CH <sub>2</sub> PH              | 150.41         | 143.15    | 7.26         |
| 2  | CH <sub>3</sub> PH <sub>2</sub> | 537.26         | 533.46    | 3.79         |
| 3  | HCP                             | 396.52         | 398.21    | -1.69        |
| 4  | OPH <sub>3</sub>                | 421.08         | 434.19    | -13.11       |
| 5  | PH <sub>2</sub> F               | 263.81         | 269.07    | -5.27        |
| 6  | Phosphinine                     | 190.31         | 178.29    | 12.02        |
| 7  | 1H-phosphole                    | 433.12         | 432.83    | 0.29         |
| 8  | SPH <sub>3</sub>                | 451.05         | 459.39    | -8.34        |
| 9  | PH <sub>2</sub> OH              | 339.40         | 338.26    | 1.14         |
| 10 | P <sub>2</sub> H <sub>2</sub>   | -174.96        | -184.26   | 9.30         |
| 11 | HP-NH                           | -180.40        | -179.27   | -1.13        |
| 12 | PH <sub>2</sub> Cl              | 403.09         | 409.77    | -6.68        |

**Table S19.** <sup>31</sup>P NMR shielding constants (in ppm) and solvent corrections ( $\Delta$ sol) of molecules 1-12 calculated at the GIAO-DFT(B97-2)/6-311++G(d,p) level of theory.

| #  | Molecule                        | Solvated phase | Gas phase | $\Delta$ sol |
|----|---------------------------------|----------------|-----------|--------------|
| 1  | CH <sub>2</sub> PH              | 73.91          | 67.30     | 6.60         |
| 2  | CH <sub>3</sub> PH <sub>2</sub> | 502.80         | 499.78    | 3.03         |
| 3  | HCP                             | 327.22         | 330.39    | -3.17        |
| 4  | OPH <sub>3</sub>                | 379.45         | 392.40    | -12.95       |
| 5  | PH <sub>2</sub> F               | 217.13         | 223.08    | -5.95        |
| 6  | Phosphinine                     | 107.94         | 95.83     | 12.11        |
| 7  | 1H-phosphole                    | 377.15         | 377.52    | -0.37        |
| 8  | SPH <sub>3</sub>                | 409.98         | 417.56    | -7.58        |
| 9  | PH <sub>2</sub> OH              | 295.45         | 294.49    | 0.96         |
| 10 | P <sub>2</sub> H <sub>2</sub>   | -258.75        | -268.56   | 9.81         |
| 11 | HP-NH                           | -279.14        | -277.85   | -1.30        |
| 12 | PH <sub>2</sub> Cl              | 355.55         | 362.11    | -6.56        |

**Table S20.**  $^{31}\text{P}$  NMR shielding constants (in ppm) and solvent corrections ( $\Delta\text{sol}$ ) of molecules **1-12** calculated at the GIAO-DFT(B97-2)/pcS-1 level of theory.

| #  | Molecule                        | Solvated phase | Gas phase | $\Delta\text{sol}$ |
|----|---------------------------------|----------------|-----------|--------------------|
| 1  | CH <sub>2</sub> PH              | 83.62          | 77.36     | 6.25               |
| 2  | CH <sub>3</sub> PH <sub>2</sub> | 512.51         | 509.23    | 3.28               |
| 3  | HCP                             | 337.66         | 341.24    | -3.58              |
| 4  | OPH <sub>3</sub>                | 391.64         | 402.92    | -11.28             |
| 5  | PH <sub>2</sub> F               | 239.44         | 244.06    | -4.62              |
| 6  | Phosphinine                     | 122.72         | 112.09    | 10.63              |
| 7  | 1H-phosphole                    | 390.37         | 390.08    | 0.29               |
| 8  | SPH <sub>3</sub>                | 418.37         | 425.77    | -7.41              |
| 9  | PH <sub>2</sub> OH              | 311.25         | 309.62    | 1.63               |
| 10 | P <sub>2</sub> H <sub>2</sub>   | -256.97        | -267.44   | 10.47              |
| 11 | HP-NH                           | -267.85        | -270.85   | 3.00               |
| 12 | PH <sub>2</sub> Cl              | 367.83         | 373.71    | -5.88              |

**Table S21.**  $^{31}\text{P}$  NMR shielding constants (in ppm) and solvent corrections ( $\Delta\text{sol}$ ) of molecules **1-12** calculated at the GIAO-DFT(B97-2)/pcS-2 level of theory.

| #  | Molecule                        | Solvated phase | Gas phase | $\Delta\text{sol}$ |
|----|---------------------------------|----------------|-----------|--------------------|
| 1  | CH <sub>2</sub> PH              | 69.07          | 62.00     | 7.07               |
| 2  | CH <sub>3</sub> PH <sub>2</sub> | 492.41         | 490.05    | 2.36               |
| 3  | HCP                             | 331.79         | 334.82    | -3.03              |
| 4  | OPH <sub>3</sub>                | 362.63         | 375.04    | -12.41             |
| 5  | PH <sub>2</sub> F               | 210.72         | 215.46    | -4.74              |
| 6  | Phosphinine                     | 104.98         | 92.85     | 12.13              |
| 7  | 1H-phosphole                    | 369.63         | 369.49    | 0.14               |
| 8  | SPH <sub>3</sub>                | 392.87         | 399.56    | -6.69              |
| 9  | PH <sub>2</sub> OH              | 284.03         | 282.52    | 1.51               |
| 10 | P <sub>2</sub> H <sub>2</sub>   | -260.22        | -269.27   | 9.06               |
| 11 | HP-NH                           | -287.02        | -287.10   | 0.08               |
| 12 | PH <sub>2</sub> Cl              | 352.60         | 357.57    | -4.97              |

**Table S22.**  $^{31}\text{P}$  NMR shielding constants (in ppm) and solvent corrections ( $\Delta\text{sol}$ ) of molecules **1-12** calculated at the GIAO-DFT(B97-2)/pcS-3 level of theory.

| # | Molecule                        | Solvated phase | Gas phase | $\Delta\text{sol}$ |
|---|---------------------------------|----------------|-----------|--------------------|
| 1 | CH <sub>2</sub> PH              | 69.10          | 62.79     | 6.31               |
| 2 | CH <sub>3</sub> PH <sub>2</sub> | 487.66         | 486.78    | 0.89               |
| 3 | HCP                             | 335.92         | 338.60    | -2.68              |
| 4 | OPH <sub>3</sub>                | 354.93         | 367.32    | -12.40             |
| 5 | PH <sub>2</sub> F               | 203.93         | 208.40    | -4.47              |

|    |                               |         |         |       |
|----|-------------------------------|---------|---------|-------|
| 6  | Phosphinine                   | 102.55  | 90.50   | 12.04 |
| 7  | 1H-phosphole                  | 365.24  | 365.32  | -0.08 |
| 8  | SPH <sub>3</sub>              | 385.26  | 391.92  | -6.66 |
| 9  | PH <sub>2</sub> OH            | 277.89  | 276.37  | 1.52  |
| 10 | P <sub>2</sub> H <sub>2</sub> | -246.94 | -252.12 | 5.19  |
| 11 | HP-NH                         | -282.49 | -282.37 | -0.12 |
| 12 | PH <sub>2</sub> Cl            | 350.18  | 354.32  | -4.14 |

**Table S23.** <sup>31</sup>P NMR shielding constants (in ppm) and solvent corrections ( $\Delta$ sol) of molecules **1-12** calculated at the GIAO-DFT(B97-2)/**pcS-4** level of theory.

| #  | Molecule                        | Solvated phase | Gas phase | $\Delta$ sol |
|----|---------------------------------|----------------|-----------|--------------|
| 1  | CH <sub>2</sub> PH              | 70.33          | 64.09     | 6.24         |
| 2  | CH <sub>3</sub> PH <sub>2</sub> | 487.73         | 487.05    | 0.68         |
| 3  | HCP                             | 336.99         | 339.57    | -2.59        |
| 4  | OPH <sub>3</sub>                | 354.82         | 367.19    | -12.37       |
| 5  | PH <sub>2</sub> F               | 204.34         | 208.82    | -4.49        |
| 6  | Phosphinine                     | 103.18         | 91.19     | 11.99        |
| 7  | 1H-phosphole                    | 365.75         | 365.86    | -0.12        |
| 8  | SPH <sub>3</sub>                | 385.36         | 392.04    | -6.68        |
| 9  | PH <sub>2</sub> OH              | 278.15         | 276.63    | 1.52         |
| 10 | P <sub>2</sub> H <sub>2</sub>   | -244.10        | -248.90   | 4.80         |
| 11 | HP-NH                           | -280.45        | -280.44   | -0.01        |
| 12 | PH <sub>2</sub> Cl              | 350.53         | 354.64    | -4.11        |

**Table S24.** <sup>31</sup>P NMR shielding constants (in ppm) and solvent corrections ( $\Delta$ sol) of molecules **1-12** calculated at the GIAO-DFT(B97-2)/**aug-pcS-1** level of theory.

| #  | Molecule                        | Solvated phase | Gas phase | $\Delta$ sol |
|----|---------------------------------|----------------|-----------|--------------|
| 1  | CH <sub>2</sub> PH              | 89.85          | 83.93     | 5.92         |
| 2  | CH <sub>3</sub> PH <sub>2</sub> | 511.02         | 510.20    | 0.82         |
| 3  | HCP                             | 342.54         | 345.17    | -2.64        |
| 4  | OPH <sub>3</sub>                | 390.44         | 402.78    | -12.34       |
| 5  | PH <sub>2</sub> F               | 229.92         | 235.03    | -5.12        |
| 6  | Phosphinine                     | 125.04         | 113.05    | 11.99        |
| 7  | 1H-phosphole                    | 388.93         | 389.16    | -0.23        |
| 8  | SPH <sub>3</sub>                | 417.31         | 424.32    | -7.01        |
| 9  | PH <sub>2</sub> OH              | 307.10         | 305.91    | 1.20         |
| 10 | P <sub>2</sub> H <sub>2</sub>   | -233.04        | -235.48   | 2.44         |
| 11 | HP-NH                           | -259.11        | -257.78   | -1.33        |
| 12 | PH <sub>2</sub> Cl              | 367.63         | 372.50    | -4.87        |

**Table S25.**  $^{31}\text{P}$  NMR shielding constants (in ppm) and solvent corrections ( $\Delta\text{sol}$ ) of molecules **1-12** calculated at the GIAO-DFT(B97-2)/**aug-pcS-2** level of theory.

| #  | Molecule                        | Solvated phase | Gas phase | $\Delta\text{sol}$ |
|----|---------------------------------|----------------|-----------|--------------------|
| 1  | CH <sub>2</sub> PH              | 69.79          | 63.31     | 6.48               |
| 2  | CH <sub>3</sub> PH <sub>2</sub> | 490.77         | 489.99    | 0.78               |
| 3  | HCP                             | 334.41         | 336.91    | -2.50              |
| 4  | OPH <sub>3</sub>                | 361.52         | 374.02    | -12.50             |
| 5  | PH <sub>2</sub> F               | 206.66         | 211.23    | -4.57              |
| 6  | Phosphinine                     | 101.51         | 89.16     | 12.34              |
| 7  | 1H-phosphole                    | 367.59         | 367.69    | -0.10              |
| 8  | SPH <sub>3</sub>                | 391.12         | 398.02    | -6.90              |
| 9  | PH <sub>2</sub> OH              | 280.87         | 279.36    | 1.51               |
| 10 | P <sub>2</sub> H <sub>2</sub>   | -249.39        | -254.87   | 5.48               |
| 11 | HP-NH                           | -283.64        | -283.80   | 0.16               |
| 12 | PH <sub>2</sub> Cl              | 351.41         | 355.71    | -4.30              |

**Table S26.**  $^{31}\text{P}$  NMR shielding constants (in ppm) and solvent corrections ( $\Delta\text{sol}$ ) of molecules **1-12** calculated at the GIAO-DFT(B97-2)/**aug-pcS-3** level of theory.

| #  | Molecule                        | Solvated phase | Gas phase | $\Delta\text{sol}$ |
|----|---------------------------------|----------------|-----------|--------------------|
| 1  | CH <sub>2</sub> PH              | 69.19          | 62.95     | 6.24               |
| 2  | CH <sub>3</sub> PH <sub>2</sub> | 487.42         | 486.76    | 0.67               |
| 3  | HCP                             | 336.14         | 338.73    | -2.59              |
| 4  | OPH <sub>3</sub>                | 354.90         | 367.31    | -12.41             |
| 5  | PH <sub>2</sub> F               | 203.69         | 208.19    | -4.50              |
| 6  | Phosphinine                     | 102.44         | 90.41     | 12.03              |
| 7  | 1H-phosphole                    | 365.09         | 365.19    | -0.10              |
| 8  | SPH <sub>3</sub>                | 385.23         | 391.94    | -6.71              |
| 9  | PH <sub>2</sub> OH              | 277.75         | 276.25    | 1.50               |
| 10 | P <sub>2</sub> H <sub>2</sub>   | -245.94        | -250.68   | 4.74               |
| 11 | HP-NH                           | -281.96        | -282.00   | 0.04               |
| 12 | PH <sub>2</sub> Cl              | 349.99         | 354.10    | -4.11              |

**Table S27.**  $^{31}\text{P}$  NMR shielding constants (in ppm) and solvent corrections ( $\Delta\text{sol}$ ) of molecules **1-12** calculated at the GIAO-DFT(B97-2)/**cc-pVDZ-LDBS** (P = aug-cc-pVDZ; rest = cc-pVDZ) level of theory.

| # | Molecule                        | Solvated phase | Gas phase | $\Delta\text{sol}$ |
|---|---------------------------------|----------------|-----------|--------------------|
| 1 | CH <sub>2</sub> PH              | 168.70         | 161.46    | 7.24               |
| 2 | CH <sub>3</sub> PH <sub>2</sub> | 559.42         | 558.35    | 1.07               |
| 3 | HCP                             | 398.23         | 399.70    | -1.47              |
| 4 | OPH <sub>3</sub>                | 457.28         | 467.42    | -10.14             |

|           |                               |         |         |       |
|-----------|-------------------------------|---------|---------|-------|
| <b>5</b>  | PH <sub>2</sub> F             | 298.41  | 302.90  | -4.49 |
| <b>6</b>  | Phosphinine                   | 198.54  | 185.93  | 12.61 |
| <b>7</b>  | 1H-phosphole                  | 444.77  | 444.40  | 0.37  |
| <b>8</b>  | SPH <sub>3</sub>              | 476.09  | 482.02  | -5.93 |
| <b>9</b>  | PH <sub>2</sub> OH            | 373.22  | 371.17  | 2.05  |
| <b>10</b> | P <sub>2</sub> H <sub>2</sub> | -139.89 | -143.42 | 3.53  |
| <b>11</b> | HP-NH                         | -147.63 | -150.09 | 2.46  |
| <b>12</b> | PH <sub>2</sub> Cl            | 423.15  | 428.11  | -4.97 |

**Table S28.** <sup>31</sup>P NMR shielding constants (in ppm) and solvent corrections ( $\Delta$ sol) of molecules **1-12** calculated at the GIAO-DFT(B97-2)/cc-pVTZ-LDBS (P = aug-cc-pVTZ; rest = cc-pVTZ) level of theory.

| #         | Molecule                        | Solvated phase | Gas phase | $\Delta$ sol |
|-----------|---------------------------------|----------------|-----------|--------------|
| <b>1</b>  | CH <sub>2</sub> PH              | 108.46         | 101.86    | 6.60         |
| <b>2</b>  | CH <sub>3</sub> PH <sub>2</sub> | 515.05         | 514.19    | 0.86         |
| <b>3</b>  | HCP                             | 351.64         | 353.97    | -2.33        |
| <b>4</b>  | OPH <sub>3</sub>                | 391.98         | 404.04    | -12.05       |
| <b>5</b>  | PH <sub>2</sub> F               | 240.76         | 245.26    | -4.49        |
| <b>6</b>  | Phosphinine                     | 138.16         | 126.16    | 12.00        |
| <b>7</b>  | 1H-phosphole                    | 395.93         | 395.88    | 0.05         |
| <b>8</b>  | SPH <sub>3</sub>                | 421.33         | 427.90    | -6.57        |
| <b>9</b>  | PH <sub>2</sub> OH              | 313.56         | 311.78    | 1.78         |
| <b>10</b> | P <sub>2</sub> H <sub>2</sub>   | -199.26        | -203.98   | 4.72         |
| <b>11</b> | HP-NH                           | -227.89        | -228.78   | 0.90         |
| <b>12</b> | PH <sub>2</sub> Cl              | 379.67         | 384.05    | -4.37        |

**Table S29.** <sup>31</sup>P NMR shielding constants (in ppm) and solvent corrections ( $\Delta$ sol) of molecules **1-12** calculated at the GIAO-DFT(B97-2)/pcS-1-LDBS (P = aug-pcS-1; rest = pcS-1) level of theory.

| #         | Molecule                        | Solvated phase | Gas phase | $\Delta$ sol |
|-----------|---------------------------------|----------------|-----------|--------------|
| <b>1</b>  | CH <sub>2</sub> PH              | 89.50          | 84.24     | 5.27         |
| <b>2</b>  | CH <sub>3</sub> PH <sub>2</sub> | 512.08         | 511.50    | 0.58         |
| <b>3</b>  | HCP                             | 342.76         | 345.88    | -3.12        |
| <b>4</b>  | OPH <sub>3</sub>                | 391.45         | 403.64    | -12.19       |
| <b>5</b>  | PH <sub>2</sub> F               | 229.62         | 234.98    | -5.36        |
| <b>6</b>  | Phosphinine                     | 126.01         | 114.70    | 11.31        |
| <b>7</b>  | 1H-phosphole                    | 389.82         | 390.30    | -0.48        |
| <b>8</b>  | SPH <sub>3</sub>                | 418.20         | 425.67    | -7.47        |
| <b>9</b>  | PH <sub>2</sub> OH              | 306.24         | 304.80    | 1.44         |
| <b>10</b> | P <sub>2</sub> H <sub>2</sub>   | -233.70        | -236.42   | 2.72         |
| <b>11</b> | HP-NH                           | -260.04        | -261.60   | 1.55         |



|    |                    |        |        |       |
|----|--------------------|--------|--------|-------|
| 12 | PH <sub>2</sub> Cl | 366.57 | 372.52 | -5.95 |
|----|--------------------|--------|--------|-------|

**Table S30.** <sup>31</sup>P NMR shielding constants (in ppm) and solvent corrections ( $\Delta$ sol) of molecules **1-12** calculated at the GIAO-DFT(B97-2)/pcS-2-LDBS (P = aug-pcS-2; rest = pcS-2) level of theory.

| #  | Molecule                        | Solvated phase | Gas phase | $\Delta$ sol |
|----|---------------------------------|----------------|-----------|--------------|
| 1  | CH <sub>2</sub> PH              | 70.45          | 63.95     | 6.50         |
| 2  | CH <sub>3</sub> PH <sub>2</sub> | 491.51         | 490.43    | 1.08         |
| 3  | HCP                             | 334.89         | 337.54    | -2.66        |
| 4  | OPH <sub>3</sub>                | 361.50         | 374.04    | -12.54       |
| 5  | PH <sub>2</sub> F               | 207.48         | 212.29    | -4.81        |
| 6  | Phosphinine                     | 104.02         | 91.82     | 12.20        |
| 7  | 1H-phosphole                    | 369.35         | 369.43    | -0.08        |
| 8  | SPH <sub>3</sub>                | 391.31         | 398.33    | -7.02        |
| 9  | PH <sub>2</sub> OH              | 282.53         | 281.14    | 1.39         |
| 10 | P <sub>2</sub> H <sub>2</sub>   | -249.55        | -255.12   | 5.57         |
| 11 | HP-NH                           | -282.76        | -282.82   | 0.07         |
| 12 | PH <sub>2</sub> Cl              | 351.86         | 356.48    | -4.62        |

**Table S31.** <sup>31</sup>P NMR shielding constants (in ppm) and solvent corrections ( $\Delta$ sol) of molecules **1-12** calculated at the GIAO-DFT(B97-2)/pcS-1-LDBS-mixed (P = aug-pecS-1, rest = pcS-1) level of theory.

| #  | Molecule                        | Solvated phase | Gas phase | $\Delta$ sol |
|----|---------------------------------|----------------|-----------|--------------|
| 1  | CH <sub>2</sub> PH              | 79.02          | 74.20     | 4.82         |
| 2  | CH <sub>3</sub> PH <sub>2</sub> | 491.81         | 491.61    | 0.20         |
| 3  | HCP                             | 342.86         | 346.01    | -3.15        |
| 4  | OPH <sub>3</sub>                | 360.12         | 372.81    | -12.69       |
| 5  | PH <sub>2</sub> F               | 207.30         | 212.40    | -5.10        |
| 6  | Phosphinine                     | 115.21         | 104.33    | 10.88        |
| 7  | 1H-phosphole                    | 372.82         | 373.26    | -0.44        |
| 8  | SPH <sub>3</sub>                | 388.65         | 396.15    | -7.50        |
| 9  | PH <sub>2</sub> OH              | 282.81         | 281.20    | 1.61         |
| 10 | P <sub>2</sub> H <sub>2</sub>   | -234.93        | -236.97   | 2.04         |
| 11 | HP-NH                           | -270.72        | -271.66   | 0.95         |
| 12 | PH <sub>2</sub> Cl              | 348.05         | 353.24    | -5.20        |

**Table S32.** <sup>31</sup>P NMR shielding constants (in ppm) and solvent corrections ( $\Delta$ sol) of molecules **1-12** calculated at the GIAO-DFT(B97-2)/pcS-2-LDBS-mixed (P = aug-pecS-2, rest = pcS-2) level of theory.

| # | Molecule | Solvated phase | Gas phase | $\Delta$ sol |
|---|----------|----------------|-----------|--------------|
|---|----------|----------------|-----------|--------------|

|    |                                 |         |         |        |
|----|---------------------------------|---------|---------|--------|
| 1  | CH <sub>2</sub> PH              | 70.53   | 64.52   | 6.01   |
| 2  | CH <sub>3</sub> PH <sub>2</sub> | 488.48  | 487.88  | 0.60   |
| 3  | HCP                             | 336.68  | 339.44  | -2.76  |
| 4  | OPH <sub>3</sub>                | 356.14  | 368.53  | -12.39 |
| 5  | PH <sub>2</sub> F               | 205.07  | 209.73  | -4.66  |
| 6  | Phosphinine                     | 104.07  | 92.39   | 11.68  |
| 7  | 1H-phosphole                    | 366.66  | 366.87  | -0.21  |
| 8  | SPH <sub>3</sub>                | 386.17  | 392.96  | -6.79  |
| 9  | PH <sub>2</sub> OH              | 279.28  | 277.77  | 1.51   |
| 10 | P <sub>2</sub> H <sub>2</sub>   | -245.06 | -249.62 | 4.56   |
| 11 | HP-NH                           | -280.20 | -280.41 | 0.21   |
| 12 | PH <sub>2</sub> Cl              | 349.15  | 353.77  | -4.62  |

**Table S33.** <sup>31</sup>P NMR shielding constants (in ppm) of molecules **13-17** calculated at the GIAO-DFT(B97-2)/**pecS-1-mixed** (P = pecS-1, rest = pcS-1) level of theory in gas phase.

| #  | Molecule                          | $\sigma_{GP}$ |
|----|-----------------------------------|---------------|
| 13 | [P≡C] <sup>-</sup>                | 38.80         |
| 14 | [HPO <sub>3</sub> ] <sup>2-</sup> | 312.52        |
| 15 | [PO <sub>4</sub> ] <sup>3-</sup>  | 294.46        |
| 16 | [CH <sub>2</sub> P] <sup>-</sup>  | -1180.30      |
| 17 | [PH <sub>2</sub> ] <sup>-</sup>   | 649.81        |

**Table S34.** <sup>31</sup>P NMR shielding constants (in ppm) of molecules **13-17** calculated at the GIAO-DFT(B97-2)/**aug-pecS-1-mixed** (P = aug-pecS-1, rest = aug-pcS-1) level of theory in gas phase.

| #  | Molecule                          | $\sigma_{GP}$ |
|----|-----------------------------------|---------------|
| 13 | [P≡C] <sup>-</sup>                | 105.92        |
| 14 | [HPO <sub>3</sub> ] <sup>2-</sup> | 302.75        |
| 15 | [PO <sub>4</sub> ] <sup>3-</sup>  | 272.48        |
| 16 | [CH <sub>2</sub> P] <sup>-</sup>  | -1015.42      |
| 17 | [PH <sub>2</sub> ] <sup>-</sup>   | 701.45        |

**Table S35.** <sup>31</sup>P NMR shielding constants (in ppm) of molecules **13-17** calculated at the GIAO-DFT(B97-2)/**pecS-2-mixed** (P = pecS-2, rest = pcS-2) level of theory in gas phase.

| #  | Molecule                          | $\sigma_{GP}$ |
|----|-----------------------------------|---------------|
| 13 | [P≡C] <sup>-</sup>                | 67.46         |
| 14 | [HPO <sub>3</sub> ] <sup>2-</sup> | 300.49        |
| 15 | [PO <sub>4</sub> ] <sup>3-</sup>  | 281.66        |
| 16 | [CH <sub>2</sub> P] <sup>-</sup>  | -1170.99      |
| 17 | [PH <sub>2</sub> ] <sup>-</sup>   | 677.24        |

**Table S36.**  $^{31}\text{P}$  NMR shielding constants (in ppm) of molecules **13-17** calculated at the GIAO-DFT(B97-2)/**aug-pecS-2-mixed** (P = aug-pecS-2, rest = aug-pcS-2) level of theory in gas phase.

| #         | Molecule                     | $\sigma_{\text{GP}}$ |
|-----------|------------------------------|----------------------|
| <b>13</b> | $[\text{P}\equiv\text{C}]^-$ | 101.26               |
| <b>14</b> | $[\text{HPO}_3]^{2-}$        | 297.26               |
| <b>15</b> | $[\text{PO}_4]^{3-}$         | 274.90               |
| <b>16</b> | $[\text{CH}_2\text{P}]^-$    | -1020.32             |
| <b>17</b> | $[\text{PH}_2]^-$            | 702.93               |

**Table S37.**  $^{31}\text{P}$  NMR shielding constants (in ppm) of molecules **13-17** calculated at the GIAO-DFT(B97-2)/**pcS-1** level of theory in gas phase.

| #         | Molecule                     | $\sigma_{\text{GP}}$ |
|-----------|------------------------------|----------------------|
| <b>13</b> | $[\text{P}\equiv\text{C}]^-$ | 47.40                |
| <b>14</b> | $[\text{HPO}_3]^{2-}$        | 328.08               |
| <b>15</b> | $[\text{PO}_4]^{3-}$         | 312.96               |
| <b>16</b> | $[\text{CH}_2\text{P}]^-$    | -1190.83             |
| <b>17</b> | $[\text{PH}_2]^-$            | 655.03               |

**Table S38.**  $^{31}\text{P}$  NMR shielding constants (in ppm) of molecules **13-17** calculated at the GIAO-DFT(B97-2)/**aug-pcS-1** level of theory in gas phase.

| #         | Molecule                     | $\sigma_{\text{GP}}$ |
|-----------|------------------------------|----------------------|
| <b>13</b> | $[\text{P}\equiv\text{C}]^-$ | 109.90               |
| <b>14</b> | $[\text{HPO}_3]^{2-}$        | 321.99               |
| <b>15</b> | $[\text{PO}_4]^{3-}$         | 300.03               |
| <b>16</b> | $[\text{CH}_2\text{P}]^-$    | -1005.20             |
| <b>17</b> | $[\text{PH}_2]^-$            | 715.81               |

**Table S39.**  $^{31}\text{P}$  NMR shielding constants (in ppm) of molecules **13-17** calculated at the GIAO-DFT(B97-2)/**pcS-2** level of theory in gas phase.

| #         | Molecule                     | $\sigma_{\text{GP}}$ |
|-----------|------------------------------|----------------------|
| <b>13</b> | $[\text{P}\equiv\text{C}]^-$ | 54.31                |
| <b>14</b> | $[\text{HPO}_3]^{2-}$        | 303.30               |
| <b>15</b> | $[\text{PO}_4]^{3-}$         | 286.29               |
| <b>16</b> | $[\text{CH}_2\text{P}]^-$    | -1121.09             |
| <b>17</b> | $[\text{PH}_2]^-$            | 677.34               |

**Table S40.**  $^{31}\text{P}$  NMR shielding constants (in ppm) of molecules **13-17** calculated at the GIAO-DFT(B97-2)/**aug-pcS-2** level of theory in gas phase.

| # | Molecule | $\sigma_{\text{GP}}$ |
|---|----------|----------------------|
|---|----------|----------------------|

|    |                                   |          |
|----|-----------------------------------|----------|
| 13 | [P≡C] <sup>-</sup>                | 97.50    |
| 14 | [HPO <sub>3</sub> ] <sup>2-</sup> | 301.01   |
| 15 | [PO <sub>4</sub> ] <sup>3-</sup>  | 293.47   |
| 16 | [CH <sub>2</sub> P] <sup>-</sup>  | -1027.19 |
| 17 | [PH <sub>2</sub> ] <sup>-</sup>   | 704.47   |

**Table S41.** <sup>31</sup>P NMR shielding constants (in ppm) of molecules **13-17** calculated at the GIAO-DFT(B97-2)/aug-pcS-4 level of theory in gas phase.

| #  | Molecule                          | σ <sub>GP</sub> |
|----|-----------------------------------|-----------------|
| 13 | [P≡C] <sup>-</sup>                | 101.31          |
| 14 | [HPO <sub>3</sub> ] <sup>2-</sup> | 295.55          |
| 15 | [PO <sub>4</sub> ] <sup>3-</sup>  | 279.97          |
| 16 | [CH <sub>2</sub> P] <sup>-</sup>  | -1008.36        |
| 17 | [PH <sub>2</sub> ] <sup>-</sup>   | 702.26          |

**Table S42.** Experimental <sup>31</sup>P NMR chemical shifts (in ppm) of molecules **3, 6, 7, 18-23**.<sup>a</sup>

| #  | Molecule                             | Solvent                       | Exp.  |
|----|--------------------------------------|-------------------------------|-------|
| 19 | Cl <sub>3</sub> CPH <sub>2</sub>     | CHCl <sub>3</sub>             | -12.0 |
| 3  | HCP                                  | CHCl <sub>3</sub>             | -32.0 |
| 20 | MeCP                                 | CHCl <sub>3</sub>             | -61.0 |
| 18 | OPMe <sub>3</sub>                    | C <sub>6</sub> H <sub>6</sub> | 31.5  |
| 21 | 1-methyl-1H-1,2,3,5-diazadiphosphole | CHCl <sub>3</sub>             | 265.1 |
|    |                                      |                               | 279.5 |
| 22 | 1,3,2-dioxaphospholane-2-oxide       | CCl <sub>4</sub>              | 21.3  |
| 6  | phosphinine                          | CHCl <sub>3</sub>             | 211.0 |
| 7  | 1H-phosphole                         | THF                           | -49.2 |
| 23 | SPMe <sub>3</sub>                    | CHCl <sub>3</sub>             | 30.57 |

<sup>a</sup> References on experimental data are given main paper (see text).

**Table S43.** Basic values of <sup>31</sup>P NMR shielding constants (σ<sub>B</sub>) of molecules **3, 6, 7, 18-23** together with relativistic (Δ<sub>rel</sub>) and vibrational (Δ<sub>vib</sub>) corrections used within the combined computational approach, in ppm.

| #  | Molecule                             | σ <sub>B</sub> <sup>a</sup> | Δ <sub>rel</sub> <sup>b</sup> | Δ <sub>vib</sub> <sup>c</sup> | σ <sub>B</sub> + Δ <sub>rel</sub> + Δ <sub>vib</sub> |
|----|--------------------------------------|-----------------------------|-------------------------------|-------------------------------|------------------------------------------------------|
| 19 | Cl <sub>3</sub> CPH <sub>2</sub>     | 375.42                      | 11.92                         | -13.86                        | 373.48                                               |
| 3  | HCP                                  | 384.73                      | 13.79                         | -10.57                        | 387.95                                               |
| 20 | MeCP                                 | 401.33                      | 12.9                          | -8.02                         | 406.21                                               |
| 18 | OPMe <sub>3</sub>                    | 312.26                      | 14.98                         | -3.27                         | 323.97                                               |
| 21 | 1-methyl-1H-1,2,3,5-diazadiphosphole | 78.38                       | 10.43                         | -8.46                         | 80.35                                                |
|    |                                      | 65.02                       | 10.16                         | -11.83                        | 63.35                                                |
| 22 | 1,3,2-dioxaphospholane-2-oxide       | 321.52                      | 14.82                         | -3.28                         | 333.06                                               |

|           |                   |        |       |        |        |
|-----------|-------------------|--------|-------|--------|--------|
| <b>6</b>  | phosphinine       | 131.64 | 11.13 | -13.64 | 129.13 |
| <b>7</b>  | 1H-phosphole      | 401.65 | 13.82 | -11.99 | 403.48 |
| <b>23</b> | SPMe <sub>3</sub> | 303.52 | 21.13 | -5.38  | 319.27 |

<sup>a</sup> GIAO-CCSD/pecS-2(pcS-2 for Cl and S), gas phase

<sup>b</sup> 4c-GIAO-DFT(SVWN5)/dyall.av3z, gas phase

<sup>c</sup> GIAO-DFT(B97-2)/pecG-2(P), rest - 6-311G(3df,3pd), VPT2, gas phase

**Table S44.** Solvent corrections to <sup>31</sup>P NMR shielding constants (in ppm) ( $\Delta_{sol}$ ) of molecules **3, 6, 7, 18-23** calculated at the GIAO-DFT(B97-2) level of theory with different basis sets.

| #         | Molecule                             | pecS-1-mixed | aug-pecS-1-mixed | pcS-1 | aug-pcS-1 | cc-pVDZ | aug-cc-pVDZ | 6-31G(d,p) | 6-31++G(d,p) |
|-----------|--------------------------------------|--------------|------------------|-------|-----------|---------|-------------|------------|--------------|
| <b>19</b> | Cl <sub>3</sub> CPH <sub>2</sub>     | -2.13        | -2.05            | -1.67 | -2.02     | -1.07   | -1.87       | -1.21      | -1.48        |
| <b>3</b>  | HCP                                  | -2.37        | -1.81            | -2.25 | -1.60     | -0.66   | -0.89       | 0.18       | -0.98        |
| <b>20</b> | MeCP                                 | 4.53         | 5.11             | 4.63  | 5.44      | 5.37    | 5.67        | 6.07       | 5.05         |
| <b>18</b> | OPMe <sub>3</sub>                    | -5.26        | -5.35            | -4.84 | -5.18     | -3.89   | -4.52       | -4.76      | -5.39        |
| <b>21</b> | 1-methyl-1H-1,2,3,5-diazadiphosphole | 3.37         | 3.48             | 3.58  | 3.76      | 3.88    | 4.20        | 3.45       | 3.60         |
|           |                                      | 0.91         | 0.73             | 0.86  | 0.62      | 1.21    | 0.78        | 1.65       | 1.18         |
| <b>22</b> | 1,3,2-dioxaphospholane-2-oxide       | -3.11        | -3.25            | -3.01 | -3.18     | -2.44   | -2.70       | -2.93      | -3.06        |
| <b>6</b>  | phosphinine                          | 7.23         | 7.92             | 7.48  | 8.32      | 7.80    | 8.51        | 8.82       | 8.41         |
| <b>7</b>  | 1H-phosphole                         | 0.09         | -0.24            | 0.27  | -0.15     | 0.84    | 0.13        | 0.48       | 0.23         |
| <b>23</b> | SPMe <sub>3</sub>                    | -5.62        | -5.17            | -5.40 | -4.86     | -4.46   | -3.90       | -5.78      | -5.71        |

**Table S45.** Scaled (against experiment) <sup>31</sup>P NMR chemical shifts (in ppm) of molecules **3, 6, 7, 18-23** calculated on the shielding constants obtained within a combined scheme  $\sigma = \sigma_{basic} + \Delta_{vib} + \Delta_{rel} + \Delta_{sol}$  with  $\sigma_{basic} + \Delta_{vib} + \Delta_{rel}$  taken from Table S43 and solvent corrections  $\Delta_{sol}$  taken from Table S44 (the latter were calculated with different basis sets).

| #         | Molecule                             | pecS-1-mixed | aug-pecS-1-mixed | pcS-1  | aug-pcS-1 | cc-pVDZ | aug-cc-pVDZ | 6-31G(d,p) | 6-31++G(d,p) | Exp.  |
|-----------|--------------------------------------|--------------|------------------|--------|-----------|---------|-------------|------------|--------------|-------|
| <b>19</b> | Cl <sub>3</sub> CPH <sub>2</sub>     | -21.08       | -20.99           | -21.35 | -20.84    | -21.25  | -20.56      | -21.17     | -21.32       | -12.0 |
| <b>3</b>  | HCP                                  | -35.32       | -35.70           | -35.23 | -35.73    | -36.13  | -36.02      | -37.03     | -36.29       | -32.0 |
| <b>20</b> | MeCP                                 | -60.47       | -60.88           | -60.37 | -61.03    | -60.42  | -60.84      | -61.18     | -60.57       | -61.0 |
| <b>18</b> | OPMe <sub>3</sub>                    | 31.55        | 31.82            | 31.34  | 31.82     | 31.08   | 31.59       | 31.89      | 32.11        | 31.5  |
| <b>21</b> | 1-methyl-1H-1,2,3,5-diazadiphosphole | 266.55       | 266.61           | 266.54 | 266.51    | 266.93  | 266.49      | 267.29     | 266.74       | 265.1 |
|           |                                      | 286.00       | 286.36           | 286.25 | 286.65    | 286.60  | 286.92      | 286.10     | 286.15       | 279.5 |

|           |                                        |        |        |        |        |        |        |        |        |       |
|-----------|----------------------------------------|--------|--------|--------|--------|--------|--------|--------|--------|-------|
| <b>22</b> | 1,3,2-<br>dioxaphospholan<br>e-2-oxide | 20.32  | 20.63  | 20.42  | 20.73  | 20.54  | 20.69  | 20.96  | 20.69  | 21.3  |
| <b>6</b>  | phosphinine                            | 213.90 | 213.39 | 213.86 | 213.17 | 214.23 | 213.40 | 213.15 | 213.14 | 211.0 |
| <b>7</b>  | 1H-phosphole                           | -53.31 | -52.80 | -53.28 | -52.72 | -53.16 | -52.57 | -52.86 | -53.02 | -49.2 |
| <b>23</b> | SPMe <sub>3</sub>                      | 36.62  | 36.34  | 36.59  | 36.21  | 36.35  | 35.67  | 37.61  | 37.13  | 30.57 |
